# Supplementary material for: Optimized synthesis of anti-COVID-19 drugs aided by retrosynthesis software
Source: Royal Society of Chemistry journal article supplement (doi:10.1039/d2md00444e), 2023-01-01

## Supplementary Information for

### **Optimized synthesis of the anti-COVID-19 drugs aided by retrosynthesis software**

Wentao Qi,<sup>†</sup> Dong Zhai,<sup>†</sup> Danna Song, Chengcheng Liu, Junxia Yang, Lei Sun, Youyong Li,<sup>\*</sup> Xingwei Li, and Weiqiao Deng<sup>\*</sup>

E-mail: [yyli@suda.edu.cn](mailto:yyli@suda.edu.cn) (Y.L.) and [dengwq@sdu.edu.cn](mailto:dengwq@sdu.edu.cn) (W.D.)

#### **Table of Contents**

|                                                                           |    |
|---------------------------------------------------------------------------|----|
| S1. Details of the digital-intellectual retrosynthesis algorithm .....    | 2  |
| S2. Experimental details.....                                             | 9  |
| S3. Price calculation of our route and the original route.....            | 13 |
| S4. Synthetic routes of other potential drugs for treating COVID-19 ..... | 15 |
| S5. Similar reactions containing pyrazine ring in the products .....      | 16 |

## S1. Details of the digital-intellectual retrosynthesis algorithm

### 1.1 Method

To correctly predict the synthetic route of favipiravir, we introduced the expertise into the retrosynthesis templates based on ASKCOS retrosynthesis program. First, we searched the chemical reactions containing pyrazine ring in the products on SciFinder database (The reactions can be found in S4 section). By analyzing these reactions, we found that they follow a unified reaction rule. The product containing pyrazine ring can be obtained by the cyclization reaction shown in Figure S1a. We wrote this generalized reaction rule into the retrosynthesis template using SMARTS expression (Figure S1b). This template can convert any target complex containing the pyrazine motif (Figure S1c) into its corresponding cyclization precursors by using the RDKit module. The original ASKCOS program cannot output the cyclization precursors for the target containing pyrazine motif. After testing, our template is valid for all targets containing pyrazine motif.

#### a) Generalized retrosynthesis rule:

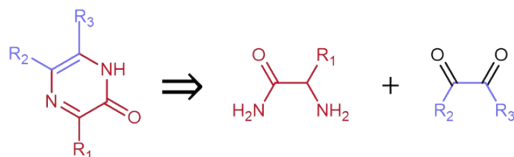

#### b) Retrosynthesis template:

```
[O]~[c;H0;D3;+0:1]1:[c:2]:[n:3]:[c:4]:[c:5]:[n;D2;+0:6]:1>>[N;H2;D1;+0:6]-  
[C;H0;D3;+0:1](=[O;D1;H0])-[C:2]-[NH2;D1;+0:3].[O;H0;D1;+0]=[C;D2;+0:4]-  
[C;D2;+0:5]=[O;H0;D1;+0]
```

#### c) Pyrazine motif:

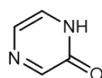

**Figure S1.** Generalized retrosynthesis rule (a) for the cyclization reaction of the target complex containing the pyrazine motif (c) and its retrosynthesis template using SMARTS expression (b).

Then we added this template and its usage condition as expert knowledge to the ASKCOS program. In the original ASKCOS program, the possible multi-step synthetic routes for a target complex were obtained by its Tree Builder module using the Monte Carlo Tree Search algorithm. Our improvement is as follow. For a given target complex, we first judge whether it contains pyrazine motif. If not, the Tree Builder module is used to obtain the possible synthetic routes for the target. If the pyrazine motif is included, our template is applied to the target to obtain its cyclization precursors. The possible synthetic routes for each precursor are obtained using the Tree Builder module. Finally, the complete synthetic routes are connected as the results. The overall flowchart is shown in Figure S2.

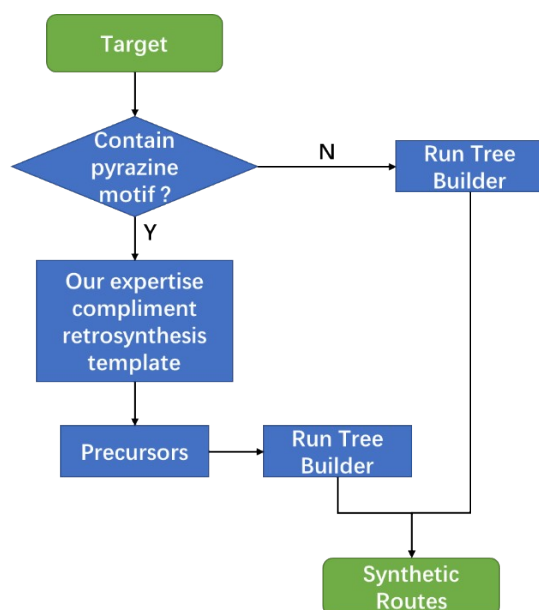

**Figure S2.** The flowchart of our digital-intellectual retrosynthesis algorithm.

### 1.2 Synthetic routes aided by AI

Total 9 synthetic routes of favipiravir less than 5 steps were obtained using our digital-intellectual retrosynthesis algorithm, as shown below (Table S1). We chose the one of the shortest routes for experimental synthesis.

**Table S1.** Synthetic routes of favipiravir designed by digital-intellectual retrosynthesis algorithm

Route 1:

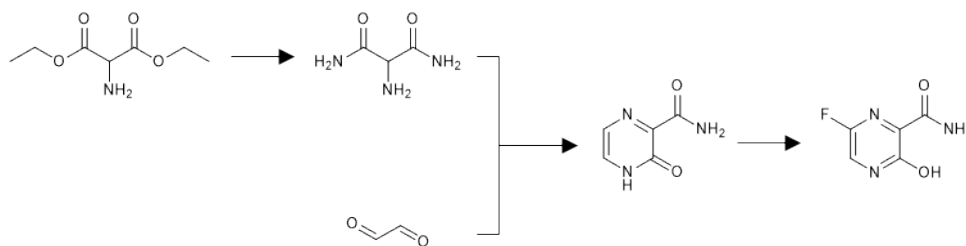

Route 2:

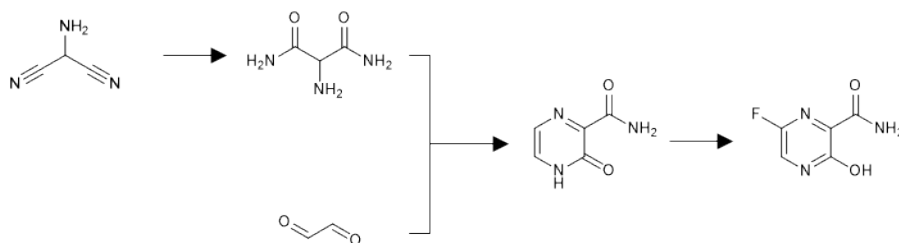

Route 3:

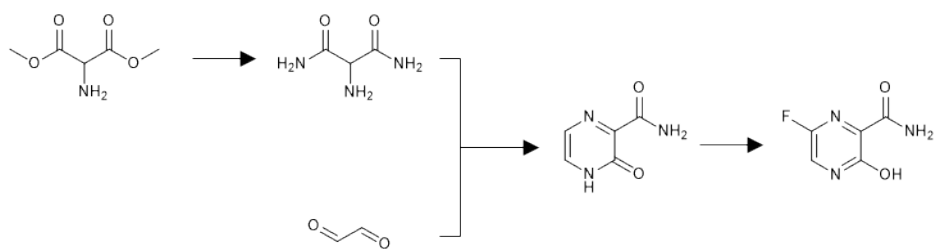

**Route 4:**

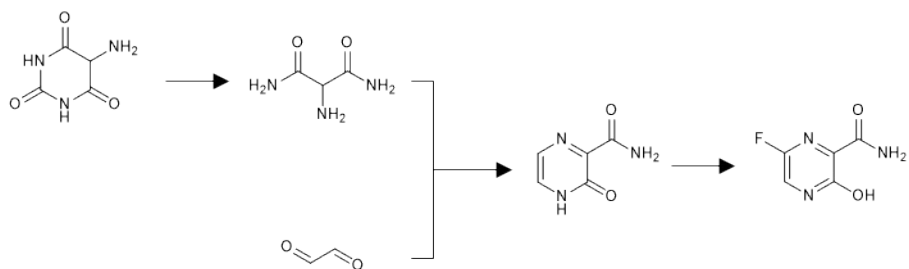

**Route 5:**

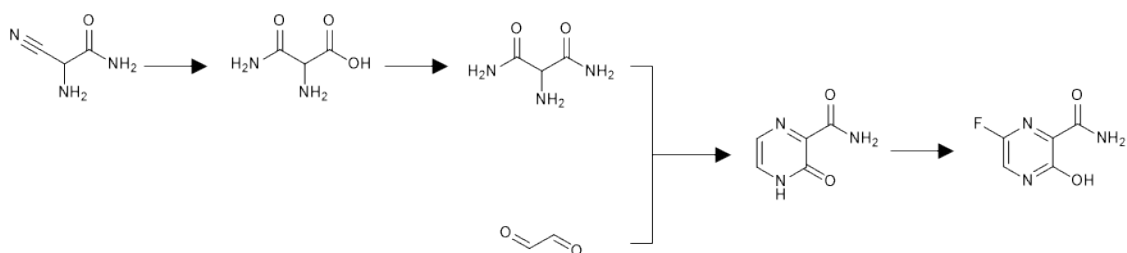

**Route 6:**

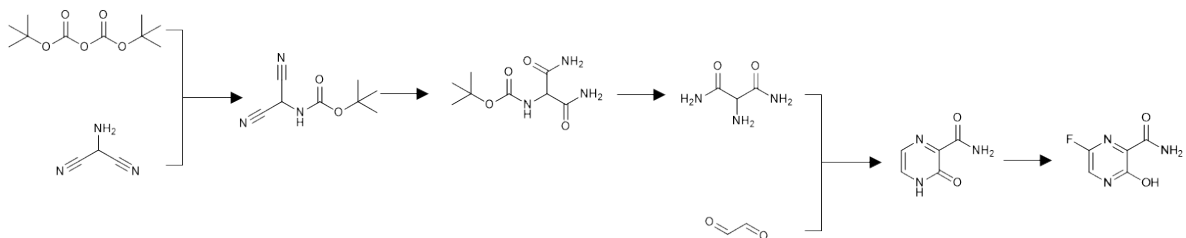

**Route 7:**

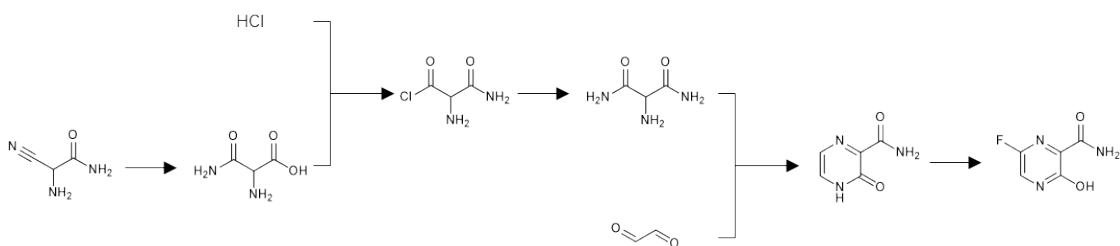

### Route 8:

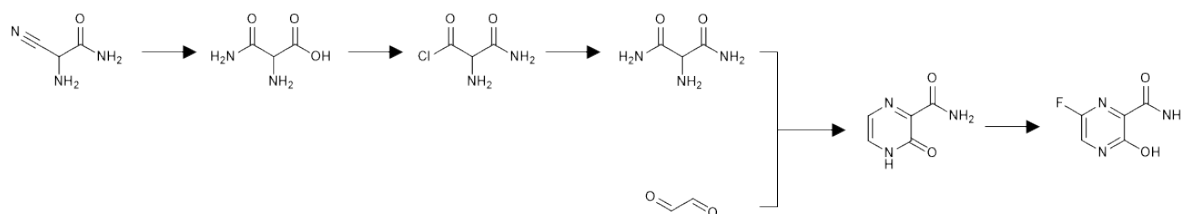

### Route 9:

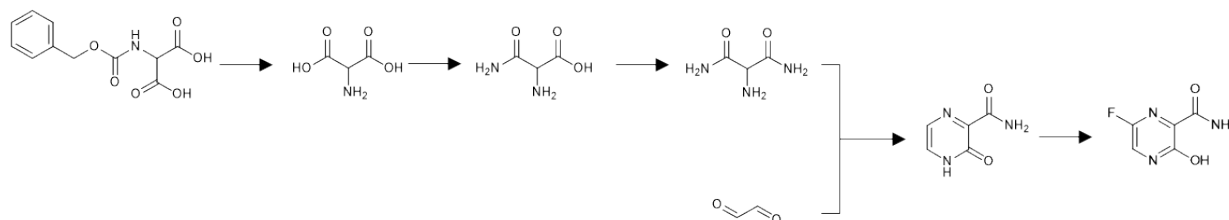

## 1.3 Computation protocol

Detailed **protocol** describing how to obtain synthetic routes using our digital-intellectual retrosynthesis algorithm:

**Step 1.** Clone the askcos-core git repository from the github:

```
git clone https://github.com/ASKCOS/askcos-core.git
```

**Step 2.** Build the askcos-core docker image according to the instructions in the README.md file of the askcos-core git repository.

Then check the name and ID of the askcos-core docker image using the following command:

```
docker images
```

An output example is shown below. The ID of askcos-core image is "2502685a2ff1".

| REPOSITORY         | TAG                         | IMAGE ID      | CREATED       | SIZE   |
|--------------------|-----------------------------|---------------|---------------|--------|
| askcos/askcos-core | latest                      | 2502685a2ff1  | 4 days ago    | 7.82GB |
| askcos/askcos-data | latest                      | eb55ef3e23a9  | 12 months ago | 5.09GB |
| askcos/askcos-base | 2020.03.6-gh2855-py37-conda | a585aec9656b  | 2 years ago   | 1.6GB  |
| askcos             | latest                      | 273c1299a407  | 3 years ago   | 4.1GB  |
| <none>             | <none>                      | b00ce64e29bc  | 3 years ago   | 1.73GB |
| <none>             | <none>                      | 1d6f1a5b931b  | 3 years ago   | 117MB  |
| <none>             | <none>                      | 45444e1018d8  | 3 years ago   | 117MB  |
| <none>             | <none>                      | 4ea9475600ba  | 3 years ago   | 117MB  |
| redis              | latest                      | 9b188f5fb1e6  | 3 years ago   | 98.2MB |
| nginx              | latest                      | f77bb5701a33c | 3 years ago   | 126MB  |
| debian             | stretch                     | f6c68e2ad82a  | 3 years ago   | 101MB  |
| rabbitmq           | latest                      | 6addf4b6a4ef  | 3 years ago   | 151MB  |

**Step 3.** Start a new docker container using the askcos-core image and run the /bin/bash command inside it:

```
docker run -it askcos/askcos-core /bin/bash
```

**Step 4.** Open another terminal and get the container ID of askcos-core using the following command:

```
docker ps
```

An output example is shown below. Get the CONTAINER ID “b37bb2eca093” of the “askcos/askcos-core” container.

| CONTAINER ID | IMAGE              | COMMAND                  | CREATED       | STATUS       | PORTS                              | NAMES                        |
|--------------|--------------------|--------------------------|---------------|--------------|------------------------------------|------------------------------|
| b37bb2eca093 | askcos/askcos-core | "/bin/bash"              | 3 minutes ago | Up 3 minutes |                                    | zealous_lumiere              |
| a0fba9604ac6 | nginx:latest       | "nginx -g 'daemon of..." | 3 years ago   | Up 4 months  | 0.0.0.0:80->80/tcp                 | deploy_nginx_1               |
| 7ec006872ed2 | askcos             | "bash -c 'celery -A ..." | 3 years ago   | Up 4 months  |                                    | deploy_te_coordinator_1      |
| 971d6c7c657f | askcos             | "bash -c 'celery -A ..." | 3 years ago   | Up 4 months  |                                    | deploy_ft_worker_1           |
| 143d5d0f7d10 | askcos             | "bash -c 'celery -A ..." | 3 years ago   | Up 4 months  |                                    | deploy_cr_coordinator_1      |
| abe7ea67e2a1 | askcos             | "bash -c 'celery -A ..." | 3 years ago   | Up 4 months  |                                    | deploy_sc_coordinator_1      |
| 9b3b8e22fc1e | askcos             | "bash -c 'uwsgi --so..." | 3 years ago   | Up 4 months  | 8000/tcp                           | deploy_app_1                 |
| e5e9a0253fda | askcos             | "bash -c 'celery -A ..." | 3 years ago   | Up 4 months  |                                    | deploy_tb_coordinator_mcts_1 |
| 9074ee4ef018 | askcos             | "bash -c 'celery -A ..." | 3 years ago   | Up 4 months  |                                    | deploy_cr_network_worker_1   |
| c3c1dc4d4706 | askcos             | "bash -c 'celery -A ..." | 3 years ago   | Up 4 months  |                                    | deploy_tb_c_worker_1         |
| 7e370d9df985 | rabbitmq           | "docker-entrypoint.s..." | 3 years ago   | Up 4 months  | 4369/tcp, 5671-5672/tcp, 25672/tcp | deploy_rabbit_1              |
| 298f1c2c002d | redis              | "docker-entrypoint.s..." | 3 years ago   | Up 4 months  | 6379/tcp                           | deploy_redis_1               |

**Step 5.** Copy our modified tree\_builder.py file to the appropriate location in the “askcos/askcos-core” container using the following command:

```
docker cp mod_tree_builder.py b37bb2eca093:/usr/local/askcos-core/askcos/retrosynthetic/mcts/
```

**Step 6.** In the “askcos/askcos-core” container, write the SMILES expression of the target molecule in “target\_smiles” variable in the “if \_\_name\_\_ == '\_\_main\_\_'” section of our mod\_tree\_builder.py file. e.g.

```
target_smiles = 'NC(=O)c1nc(F)cnc1O' # this example expression represents favirpiravir
```

**Step 7.** Run the modified tree builder module to obtain the synthetic routes using the following command:

```
cd /usr/local/askcos-core/askcos/retrosynthetic/mcts/  
  
python mod_tree_builder.py
```

The result of the synthetic routes is saved in the “routes.txt” file.

## S2. Experimental details

### 2.1 General details

All reactions were carried out in constant temperature oil-bath pans with magnetic stirring. Solvents and reagents were purchased from commercial companies and used as received without further purification. Visualization was accomplished with UV light. <sup>1</sup>H NMR spectra were recorded on Bruker AVANCE NEO 600MHz spectrometer and are reported in ppm using solvent as an internal standard (DMSO-d<sub>6</sub> at 2.50 ppm). Accurate masses were obtained using a Thermo Scientific Q Exactive Hybrid Quadrupole-Orbitrap Mass Spectrometer.

### 2.2 Materials

Diethyl aminomalonate hydrochloride (>98% purity; CAS. no. 13433-00-6) was purchased from Shanghai Jinsui Biotechnology Co., LTD. Glyoxal (40 wt. % in H<sub>2</sub>O; CAS. no. 107-22-2) was obtained from Acmechem. Selectfluor (>95% purity; CAS. no. 140681-

55-6) was obtained from Meryer. Aqua ammonia ( $\text{NH}_3 \cdot \text{H}_2\text{O}$ , 28%; CAS. no. 7664-41-7), Methanol (MeOH, >99% purity; CAS. no. 67-56-1), N,N-Dimethylformamide (DMF, >99% purity; CAS. no. 68-12-2), sodium hydroxide (NaOH, >99% purity; CAS. no. 1310-73-2), and hydrochloric acid (HCl, 37%; CAS. no. 7647-01-0) were purchased from Sinopharm.

### 2.3 Synthesis of favipiravir

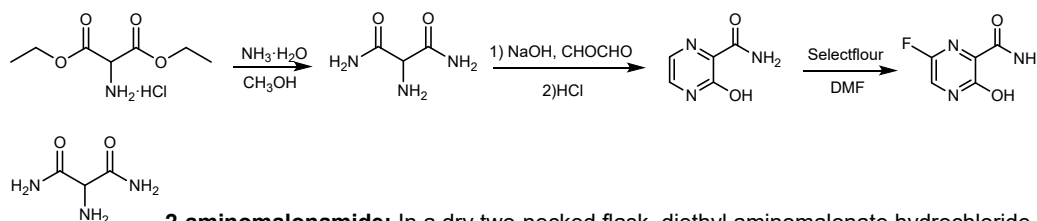

**2-aminomalonamide:** In a dry two-necked flask, diethyl aminomalonate hydrochloride (5 g) was dissolved in methanol (5 mL), then ammonia (10 mL) was added and the mixture was stirred at room temperature for 24 h. After the reaction, ethanol was added to get precipitate, and the precipitate was washed with ethanol and dried under vacuum to get a bright yellow solid. (Yield: 66.48%).  $^1\text{H}$  NMR (600 MHz, DMSO- $d_6$ )  $\delta$  7.32 (d,  $J$  = 108.0 Hz, 4H), 3.75 (s, 1H), 2.37 (s, 2H).  $^{13}\text{C}$  NMR (151 MHz, DMSO- $d_6$ )  $\delta$  171.65, 57.65; HRMS (ESI) Calcd for  $\text{C}_3\text{H}_8\text{N}_3\text{O}_2$  [M+H] 118.06, found 118.0614.

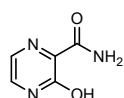

**3-hydroxypyrazine-2-carboxamide:** Aminomalonamide (1 g) was dissolved in 20% NaOH solution (5 mL). Then 40% glyoxal (1.16 mL) was added dropwise and stirred at rt for 4 h. The mixture was adjusted to pH=2 with 6 M HCl and filtered. Washed with 95% ethanol and dried under vacuum, the precipitate was a canary yellow solid. (Yield: 77.45%).  $^1\text{H}$  NMR (600 MHz, DMSO- $d_6$ )  $\delta$  13.23 (s, 1H), 8.71 (s, 1H), 8.11 (d,  $J$  = 25.3 Hz, 2H), 7.92 (s, 1H).  $^{13}\text{C}$  NMR (151 MHz, DMSO- $d_6$ )  $\delta$  169.53, 167.55, 159.37, 155.32, 128.61; HRMS (ESI) Calcd for  $\text{C}_5\text{H}_4\text{N}_3\text{O}_2$  [M-H] 138.04, found 138.02943.

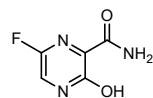

**6-fluoro-3-hydroxypyrazine-2-carboxamide (favipiravir):** 3-hydroxypyrazine-2-carboxamide (0.1391 g) and selectflour (0.531 g) were dissolved in 10 mL DMF and stirred at 50 °C for 60 h. Most solvents were removed using a rotary evaporator and the resulting mixture was extracted with ethyl acetate (20 mL $\times$ 3) and washed with brine (10 mL $\times$ 3). The combined organic phase was dried over  $\text{Na}_2\text{SO}_4$ . After filtration and removal of the solvent, a canary yellow solid product was obtained. (Yield: 62.89%).  $^1\text{H}$  NMR (600 MHz, DMSO- $d_6$ )  $\delta$  13.40 (s, 1H), 8.73 (s, 1H), 8.54 – 8.44 (m, 2H).  $^{13}\text{C}$  NMR (151 MHz, DMSO- $d_6$ )  $\delta$  169.11, 160.17, 152.85 (d,  $J$  = 243.1 Hz), 136.13 (d,  $J$  = 41.3 Hz), 122.93; HRMS (ESI) Calcd for  $\text{C}_5\text{H}_3\text{FN}_3\text{O}_2$  [M-H] 156.03, found 156.0203.

### 2.4 Raw spectra data

Qventao-1 #20 RT: 0.11 AV: 1 SB: 2.007.019 NL: 7.65E7  
T: FTMS+pESI Full lockms [80.0000-1200.0000]

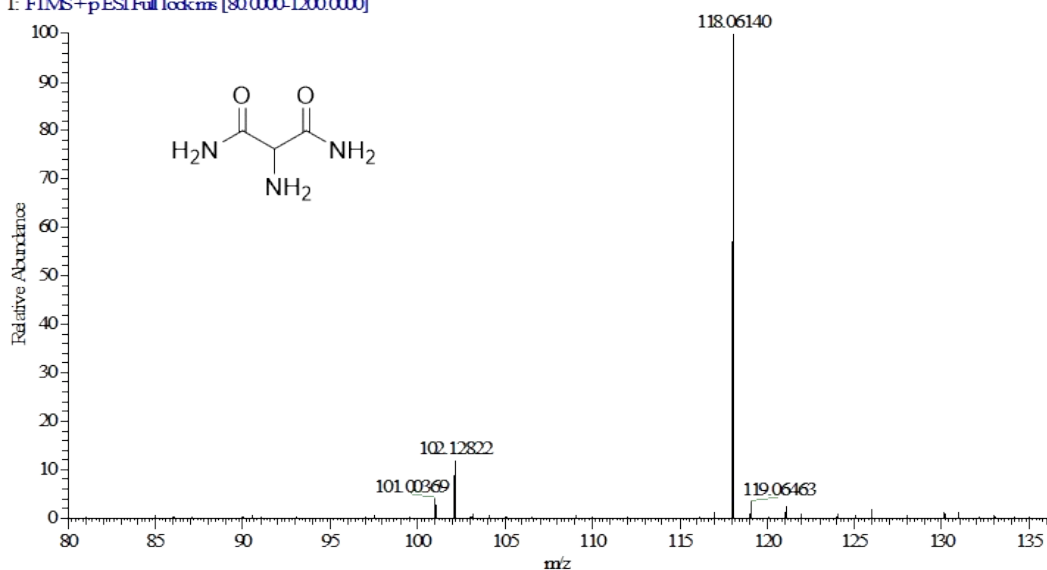

Qventao-2\_210319133701 #10 RT: 0.10 AV: 1 NL: 9.37E7  
T: FTMS-pESI Full ms [50.0000-750.0000]

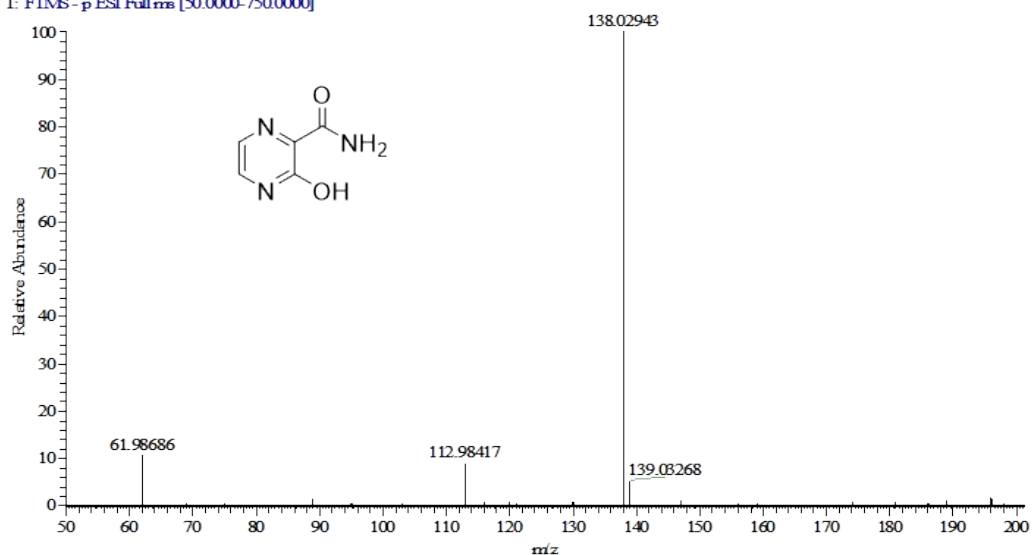

Qventao-1 #116 RT: 1.44 AV: 1 NL: 5.54E8  
T: FTMS-pESI Full ms [50.0000-750.0000]

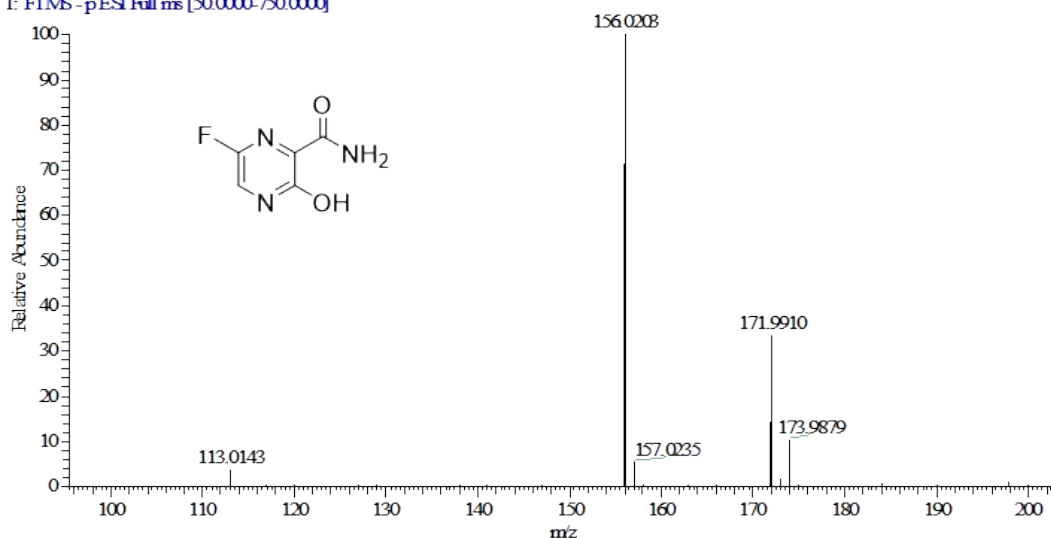



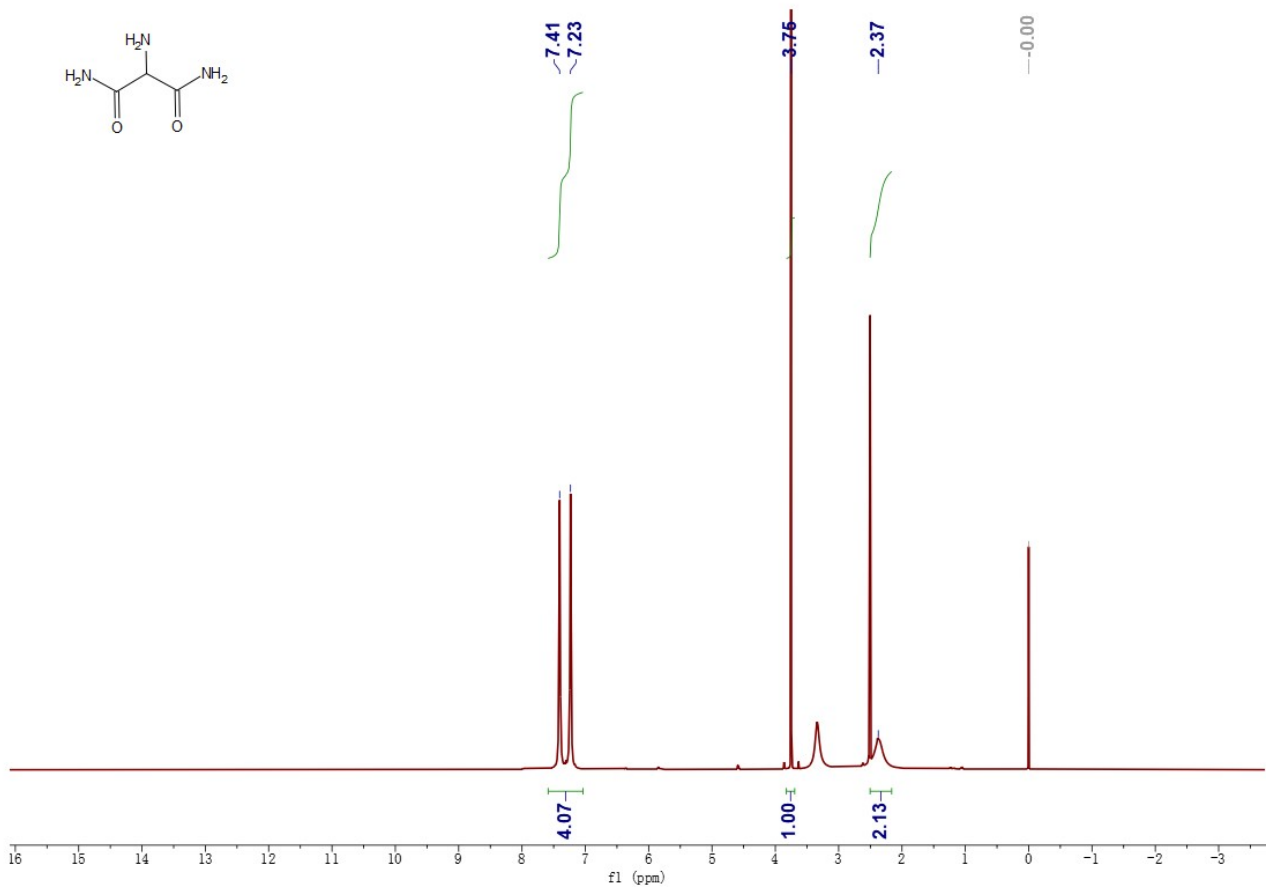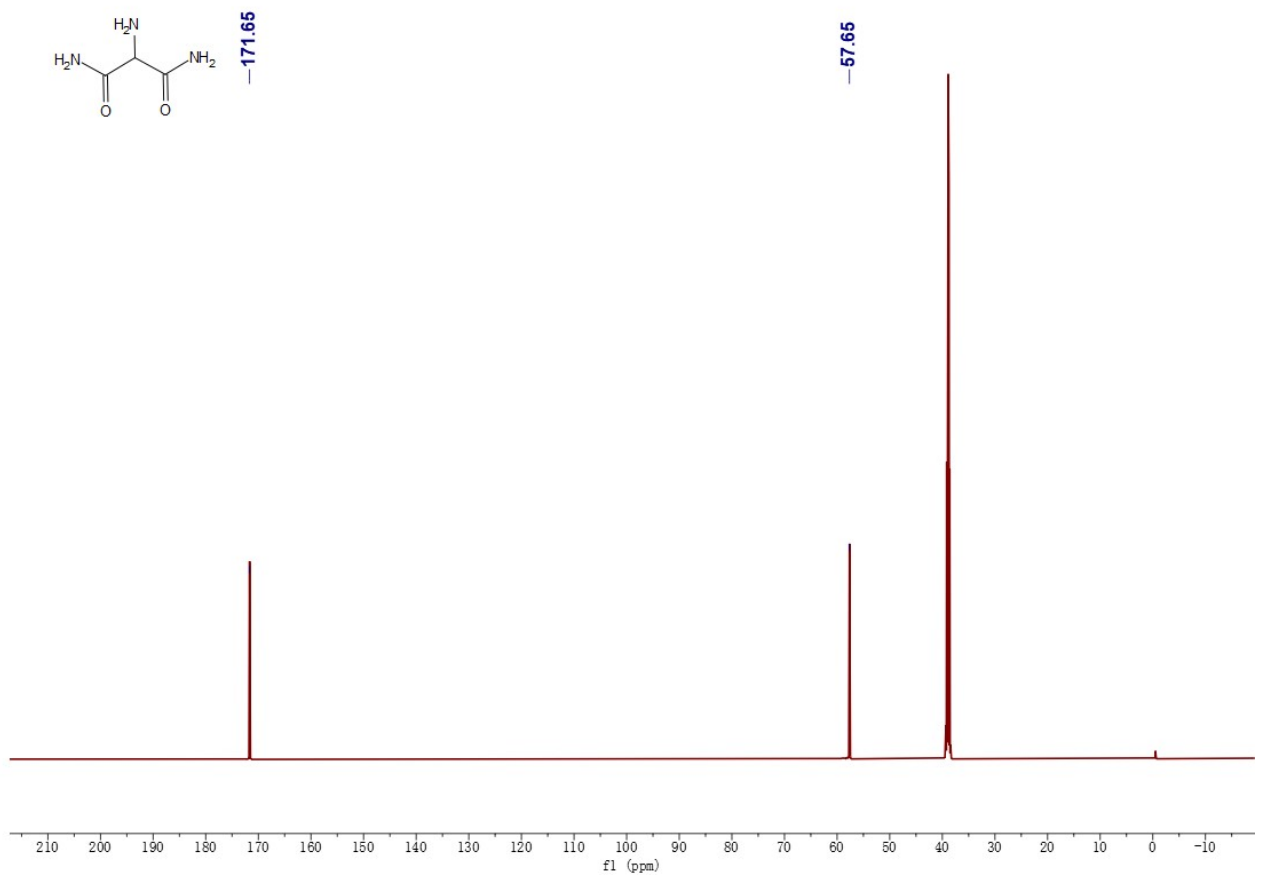

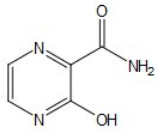

13.23

8.71

8.13

8.09

7.92

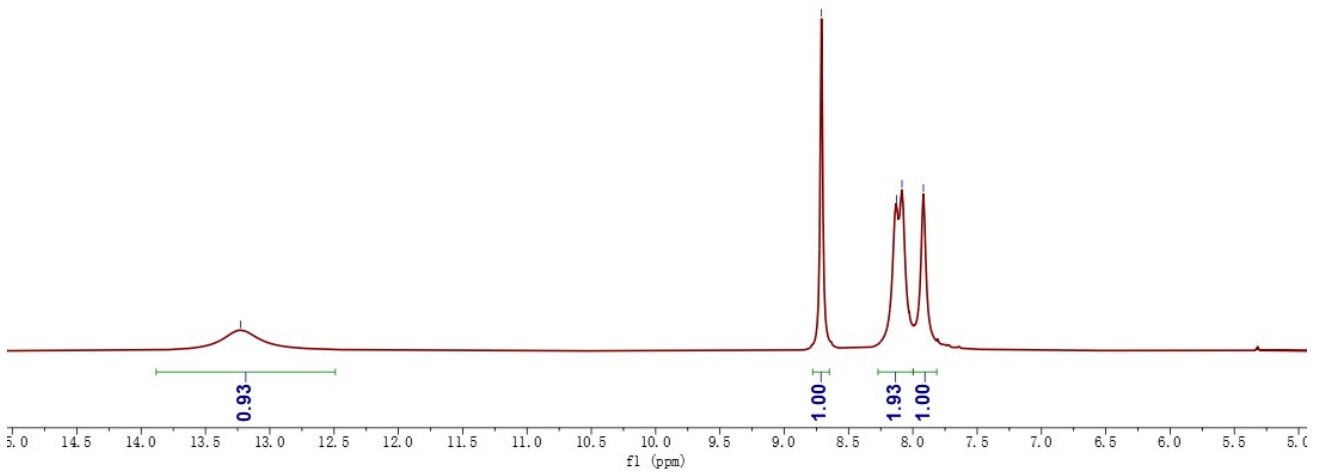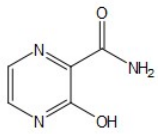

169.53

167.55

159.37

155.32

128.61

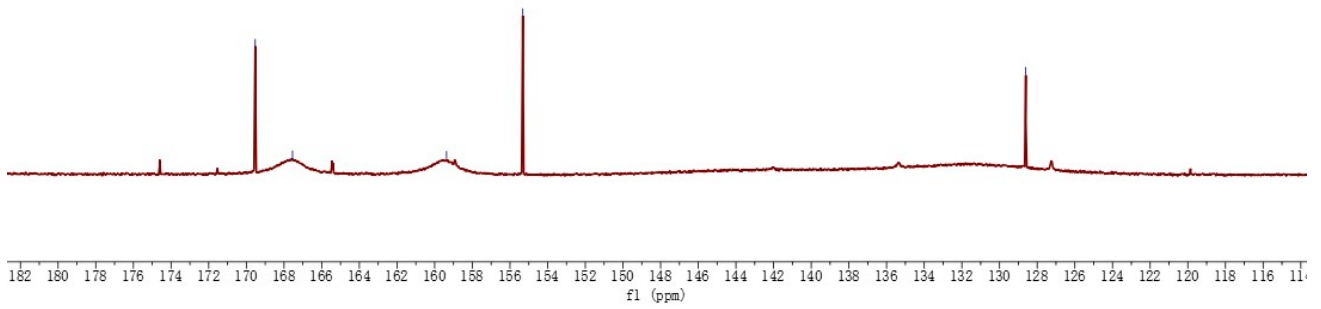

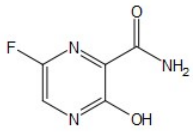

13.40

8.73  
8.51  
8.50  
8.49

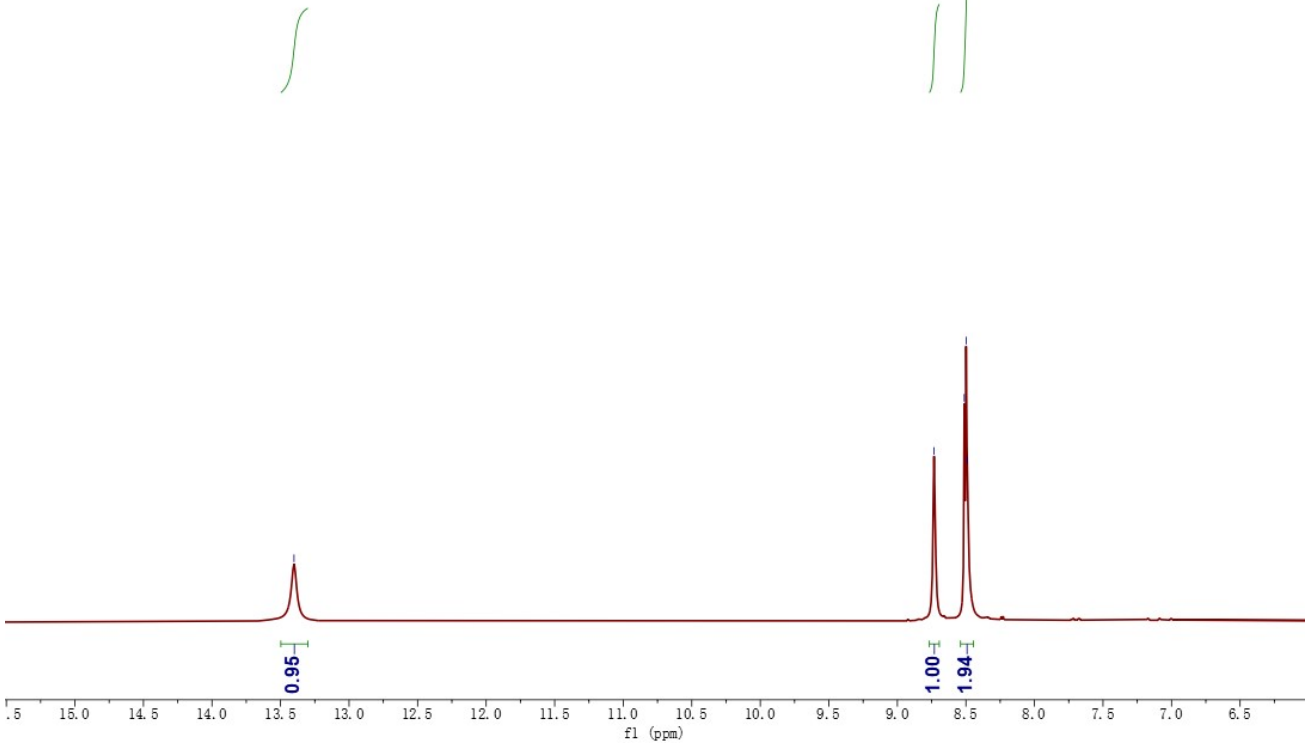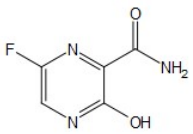

169.11

160.17

153.65

152.04

136.27

135.99

122.93

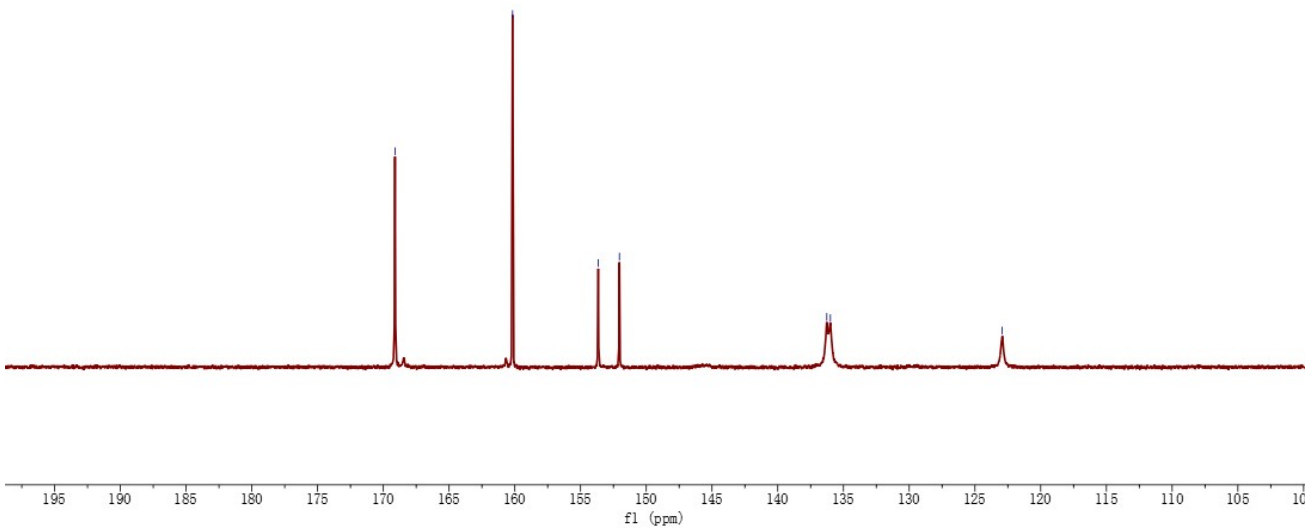

### S3. Price calculation of our route and the original route

We calculated the cost of our route and the original route based on the assumption that 1 mol of starting materials was used. The price and quantities of the reagent/reactant involved are shown below (Table S2). All manufacturers and price information source from MOLBASE (www.molbase.com) except some controlled products.

**Table S2.** All material the original route used (a) and our route used (b).

a) All material the original route used

| Reagent/reactant                               | CAS NO.    | Price (\$)   | Manufacturers                               | Consumption |
|------------------------------------------------|------------|--------------|---------------------------------------------|-------------|
| 3-Aminopyrazine-2-carboxylic acid              | 5424-01-1  | 333.33/1kg   | Ester (Chengdu) Biopharmaceutical Co., Ltd. | 139.11g     |
| Methanol                                       | 67-56-1    | 300/1t       | Xi'an Lichang Chemical Technology Co., Ltd. | 32.04g      |
| N-Bromosuccinimide                             | 128-08-5   | 20.00/1kg    | Shanghai Angsi Biology Techology Co.,Ltd    | 156.6g      |
| Sodium nitrite                                 | 7632-00-0  | 30.00/1kg    | Shanghai Dumit Biotechnology Co.,Ltd        | 71g         |
| Sulfuric acid                                  | 7664-93-9  | 0.164/1L     | Sinopharm Chemical Reagent Co., Ltd.        | 0.66L       |
| Benzophenone imine                             | 1013-88-3  | 66.00/25kg   | HeBei GuanLang Biotechnology Co.,Ltd        | 37.2g       |
| Tris(dibenzylideneacetone)dipalladium          | 51364-51-3 | 7091.67/1kg  | Tianjin Leju Technology Co., Ltd.           | 1.53g       |
| 2,2'-Bis(diphenylphosphino)-1,1'-binaphthalene | 98327-87-8 | 2,000.00/1kg | Tianjin Leju Technology Co., Ltd.           | 3.1g        |
| Sodium tert-butoxide                           | 865-48-5   | 78.00/1kg    | Beijing Huawei Ruike Chemical Co., Ltd.     | 22.39g      |
| Ammonia                                        | 7664-41-7  | 66.00/25kg   | HeBei GuanLang Biotechnology Co.,Ltd        | 0.092L      |
| Pyridine hydrofluoride                         | 62778-11-4 | 183.33/1kg   | Shanghai Jiangge Chemical Co., Ltd.         | 0.089L      |
| Sodium iodide                                  | 7681-82-5  | 40.00/1kg    | Jinan Wenyi Chemical Technology Co.,Ltd.    | 34g         |
| Chlorotrimethylsilane                          | 75-77-4    | 11.67/1kg    | Rizhao Power Texaco Chemical Co. Ltd.       | 24.75g      |

Yield of favipiravir: 1.287g

b) All material our route used

| Reagent/reactant                    | CAS NO.    | Price (\$)  | Manufacturers                     | Consumption |
|-------------------------------------|------------|-------------|-----------------------------------|-------------|
| Diethyl Aminomalonate Hydrochloride | 13433-00-6 | 165.00/500g | Nanjing Chemlin Chemical Industry | 211.6g      |

|                               |             |             |                                                   |          |         |
|-------------------------------|-------------|-------------|---------------------------------------------------|----------|---------|
|                               |             |             |                                                   | Co.,Ltd. |         |
| Ammonia                       | 7664-41-7   | 66.00/25kg  | HeBei GuanLang Biotechnology Co.,Ltd              |          | 0.422L  |
| Sodium hydroxide              | 1310-73-2   | 6,770.00/1t | Lianyungang Longtaiwei Food Ingredients Co., Ltd. |          | 0.0284g |
| Glyoxal                       | 107-22-2    | 5.83/500mL  | shandong xiya chemical technology Co.,LTD         |          | 0.091L  |
| Selectflour                   | 140681-55-6 | 23.00/1kg   | Aobo Rui (Tianjin) Technology Co., Ltd.           |          | 273.4g  |
| Yield of favipiravir: 50.836g |             |             |                                                   |          |         |

#### S4. Synthetic routes of other potential drugs for treating COVID-19

##### Molnupiravir:

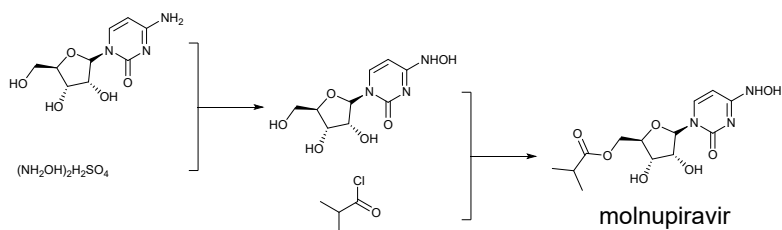

##### Sabizabulin:

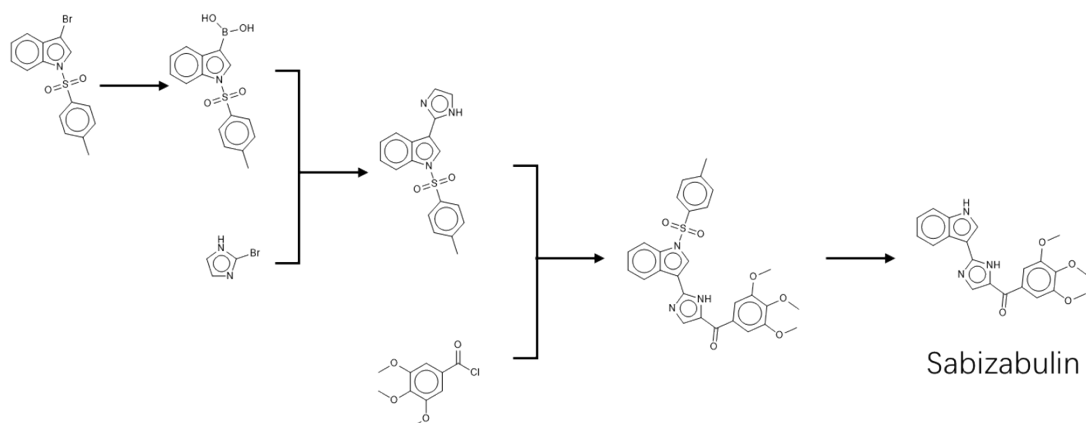

Chlorpromazine:

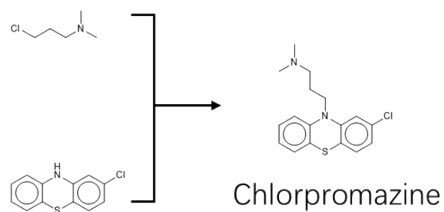

Fluvoxamine:

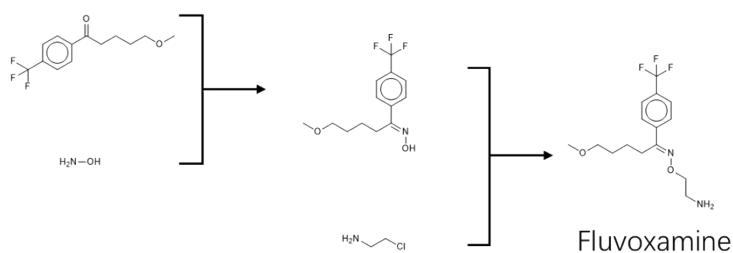

Ritonavir:

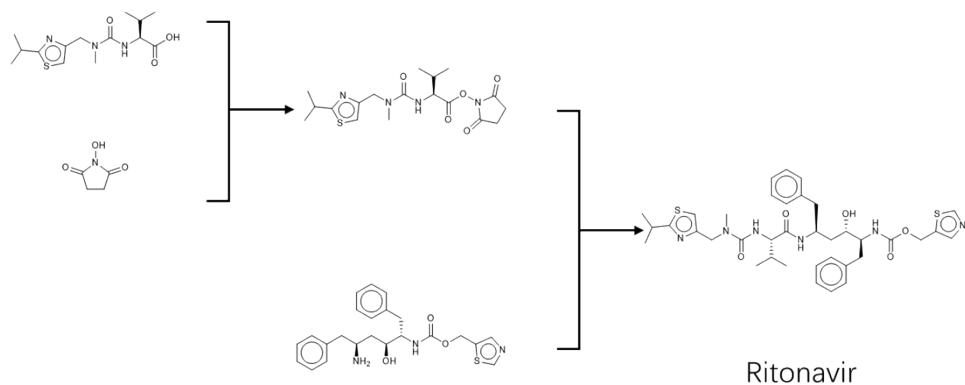

## S5. Similar reactions containing pyrazine ring in the products

Some similar reactions containing pyrazine ring in the products we found are on SciFinder database shown below. The expertise template is obtained accordingly.

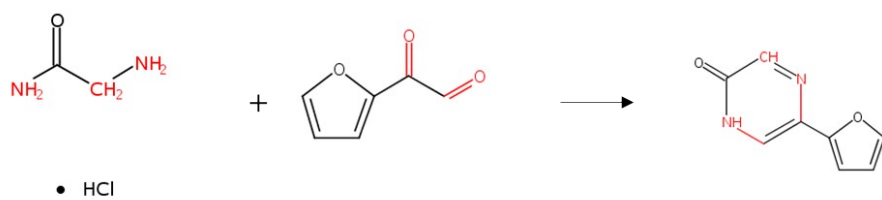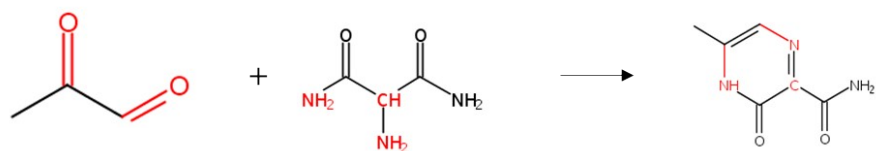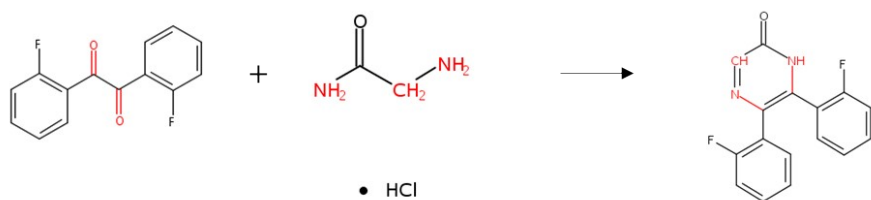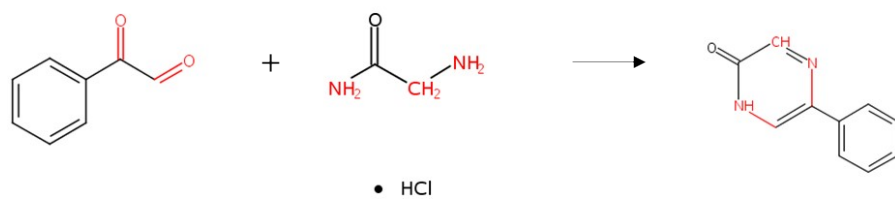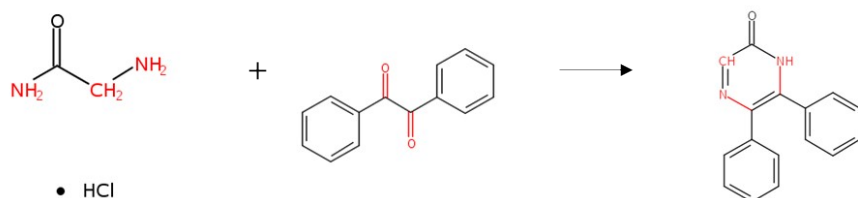

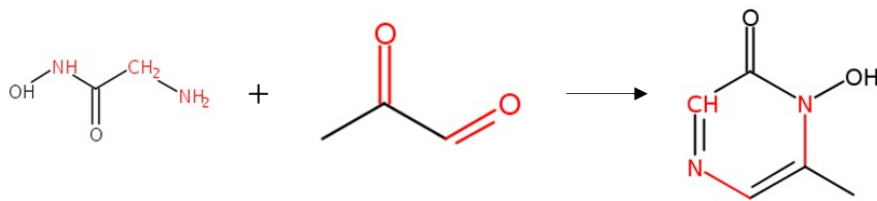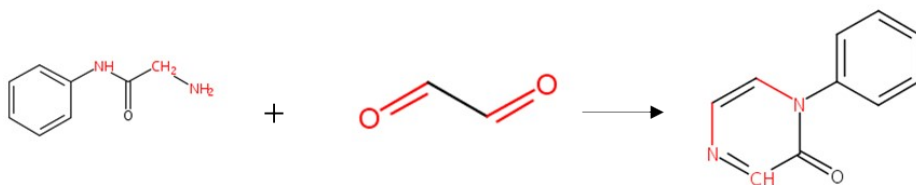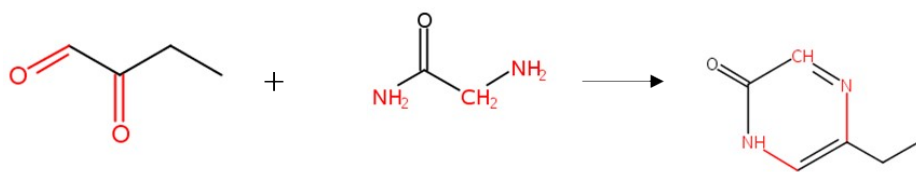

• HCl

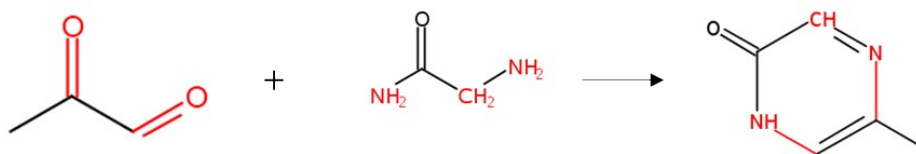

• HCl

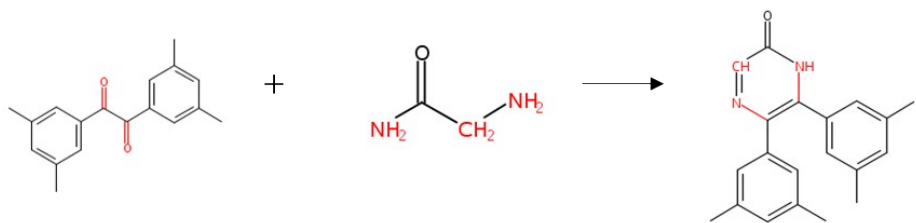

• HCl



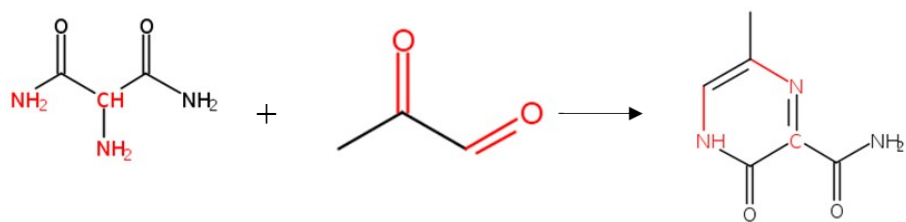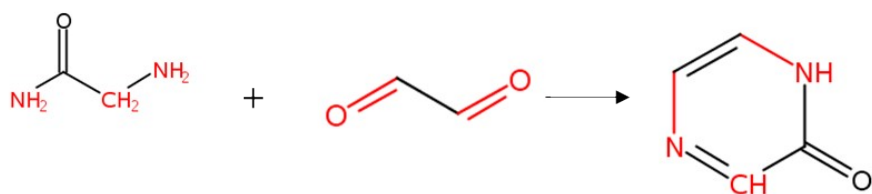

• HCl

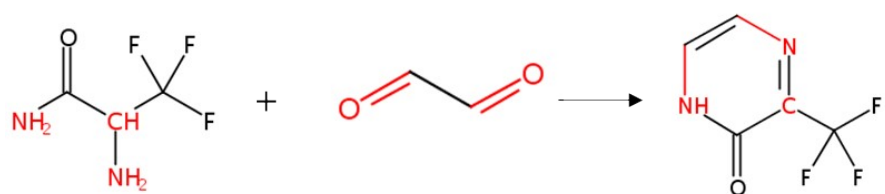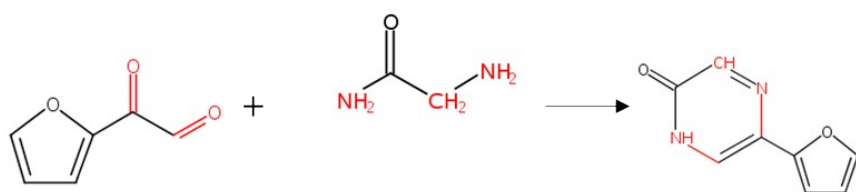

• HCl

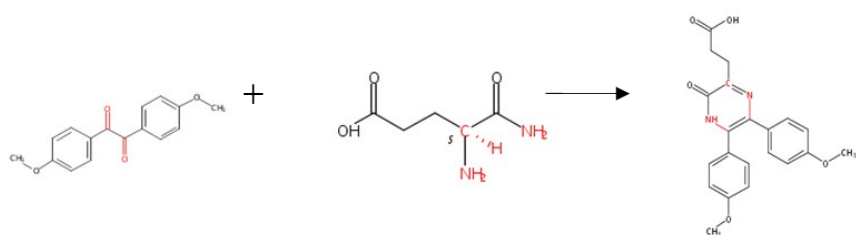

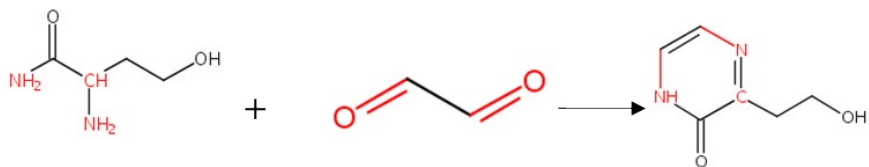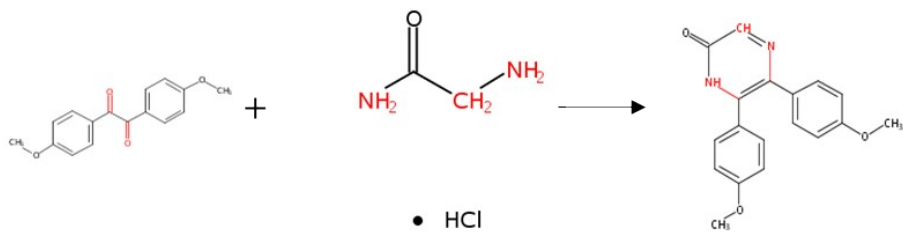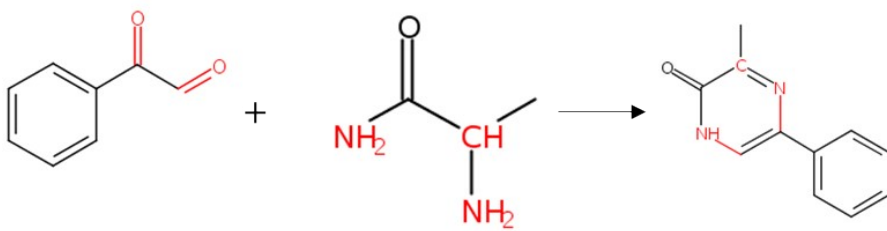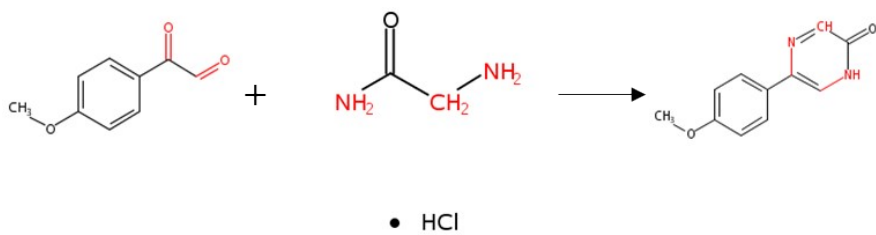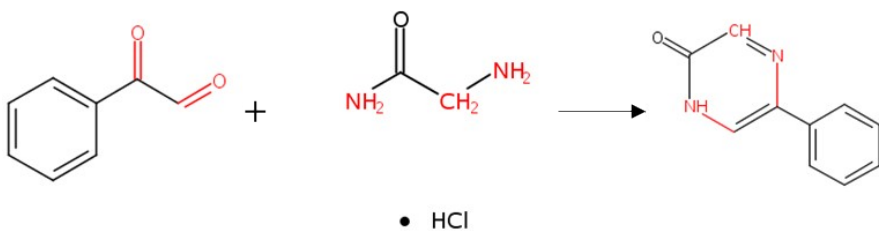

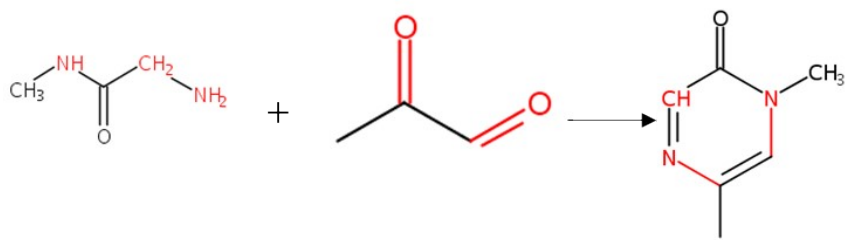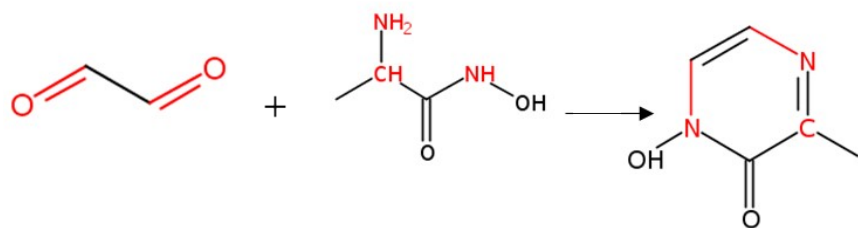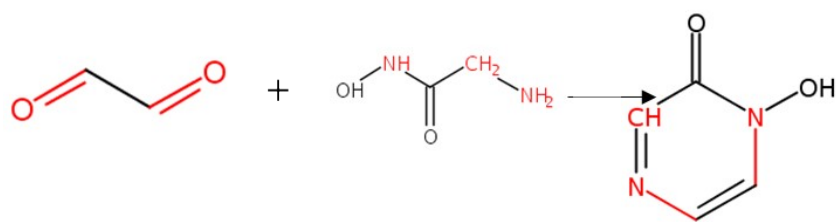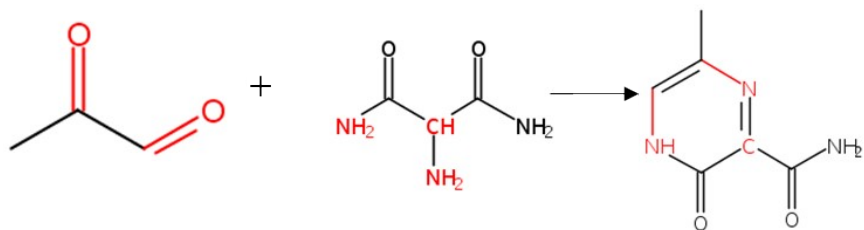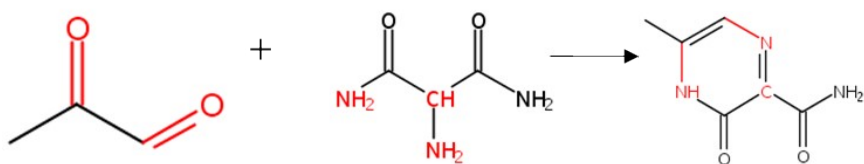

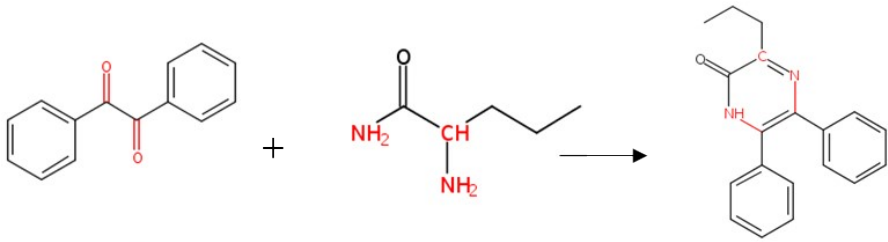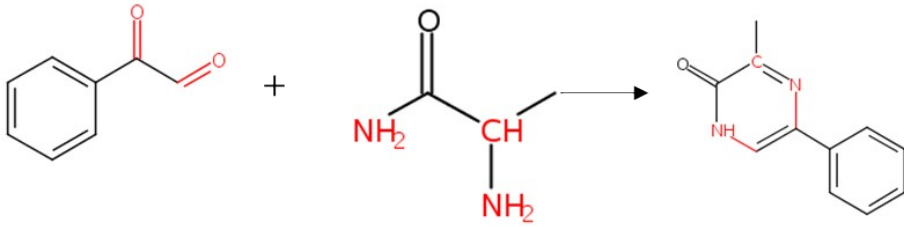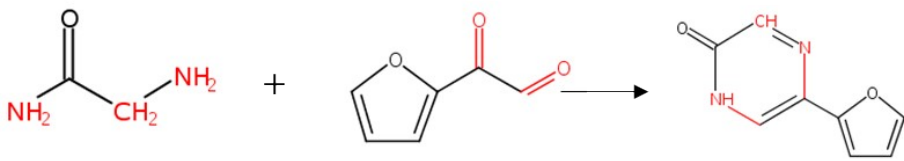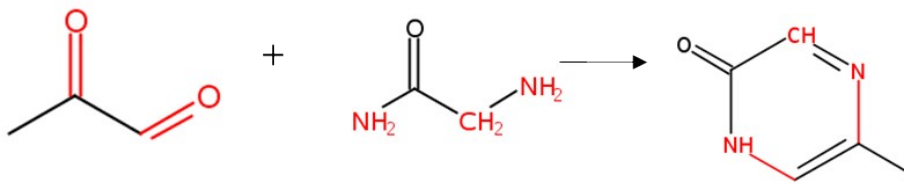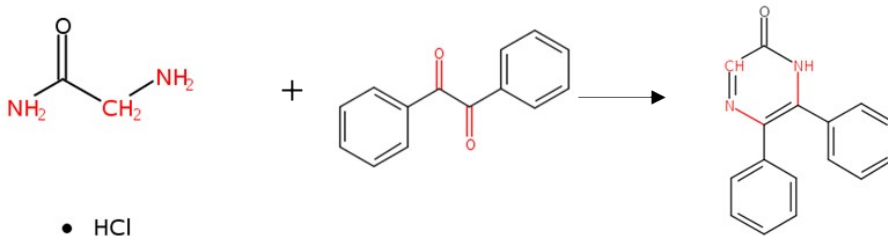

• HCl

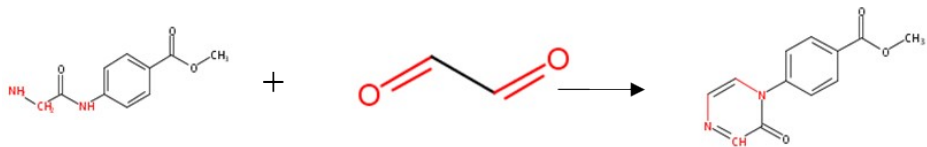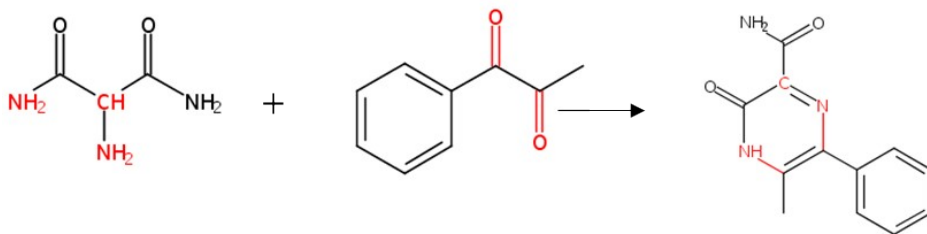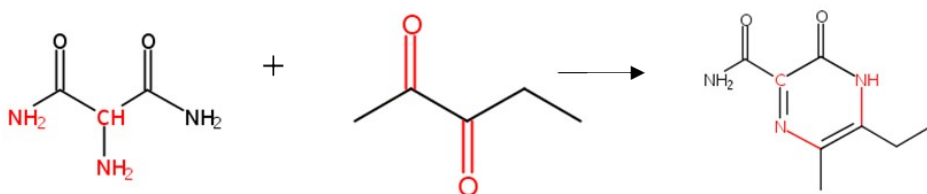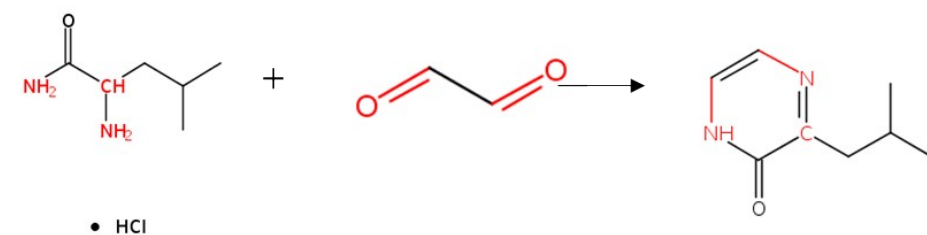

• HCl

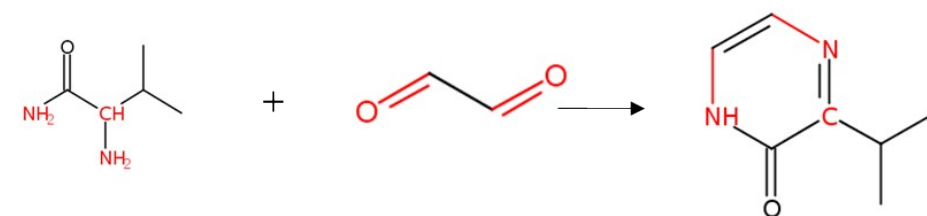

• HCl

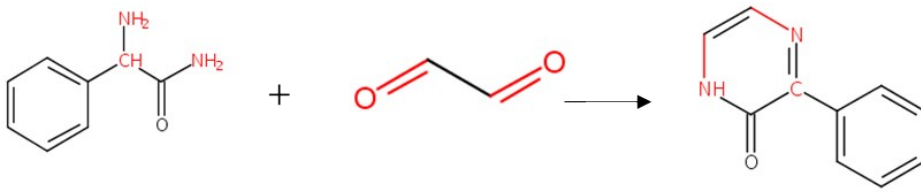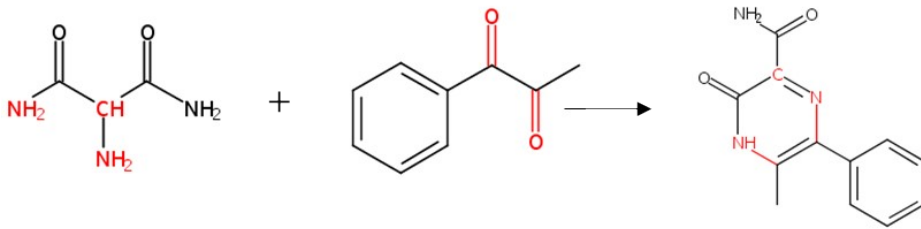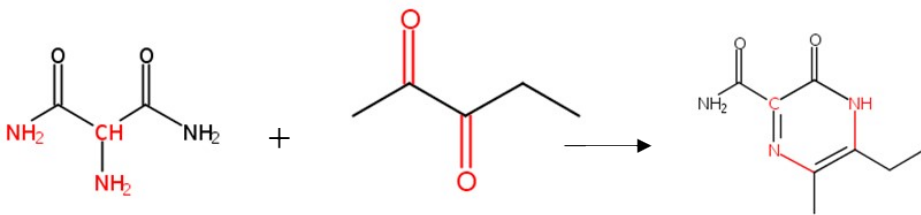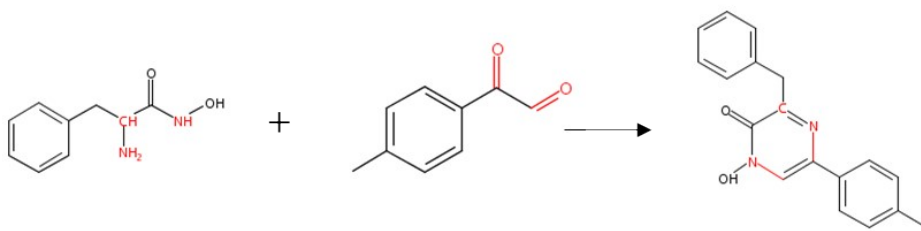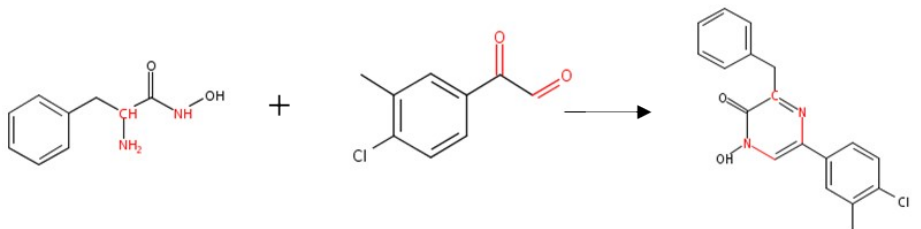

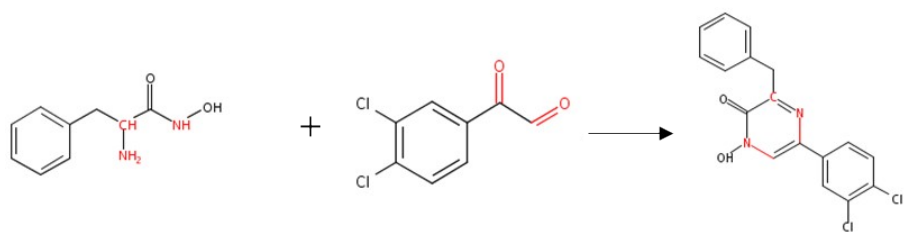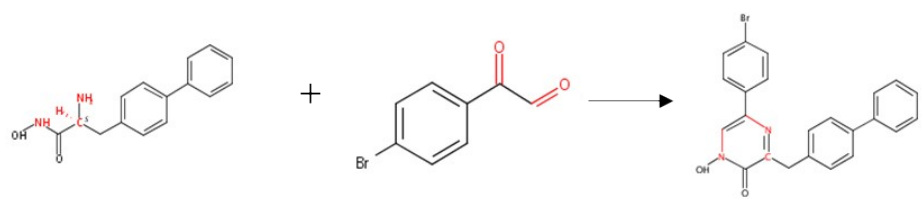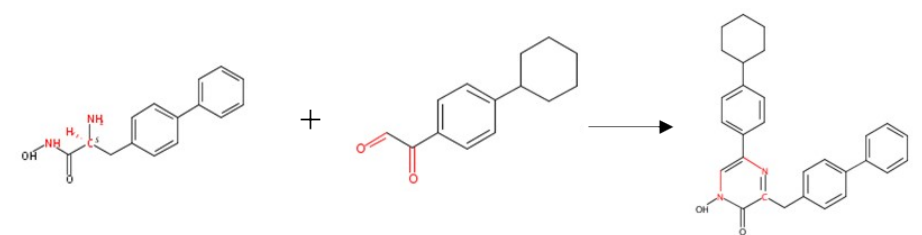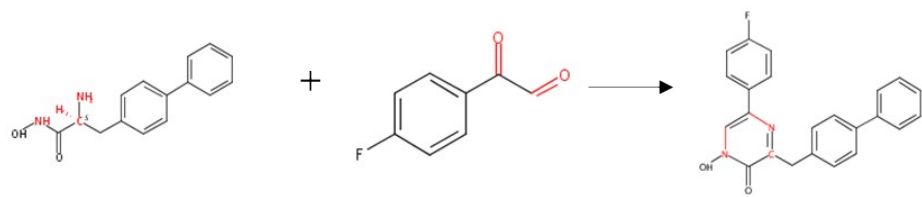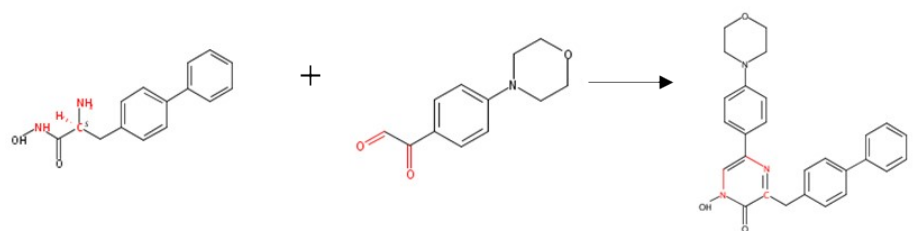

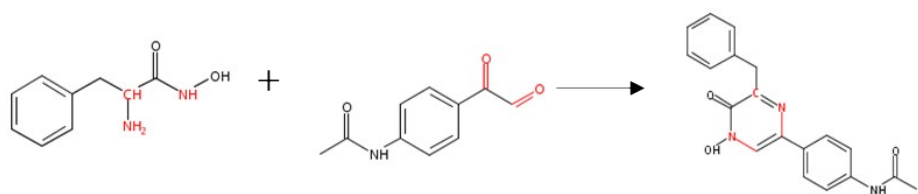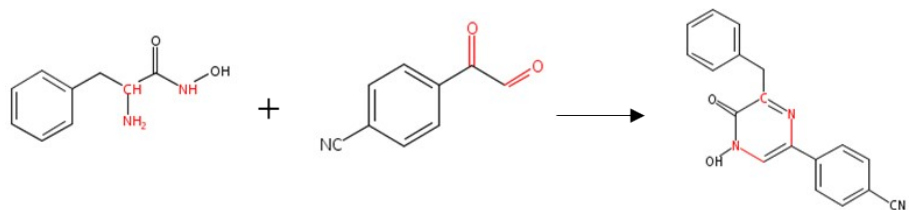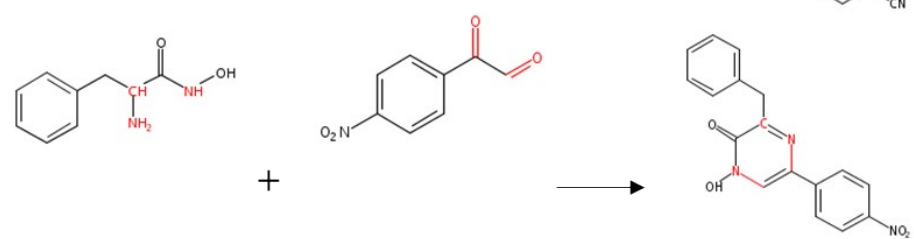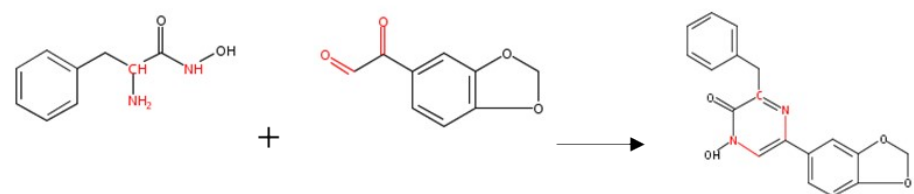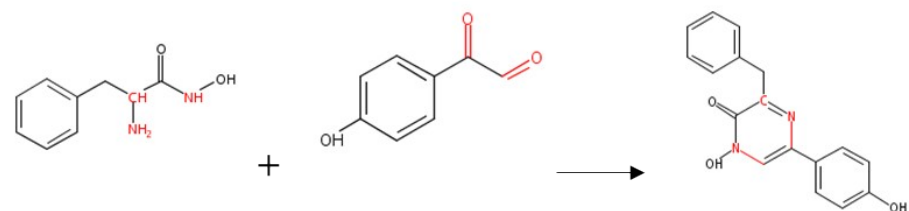



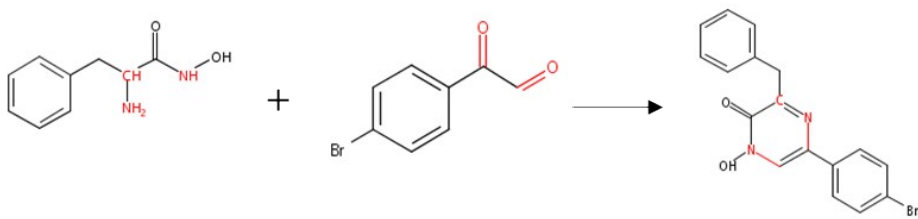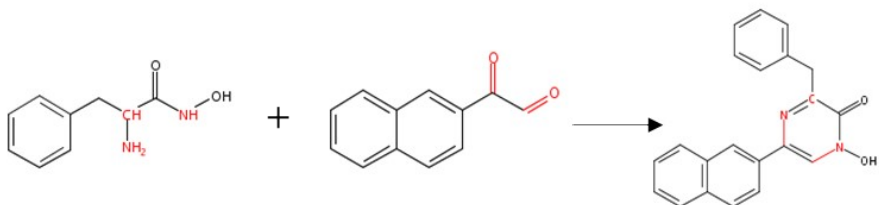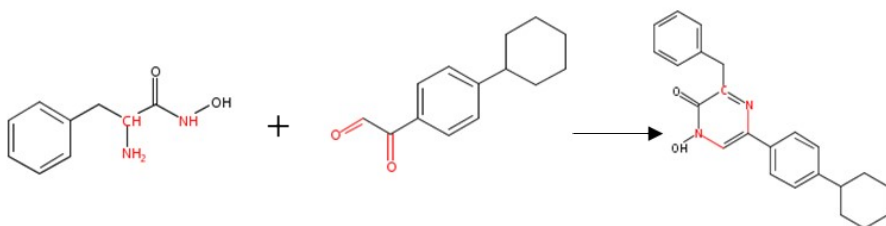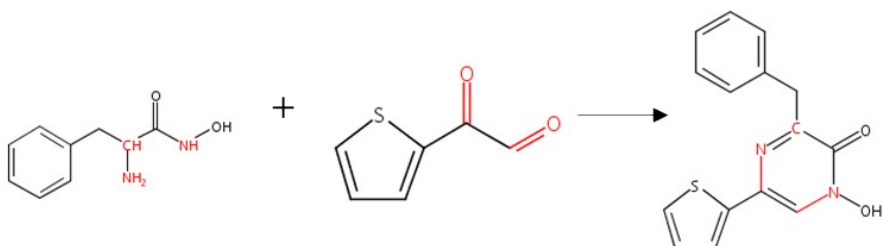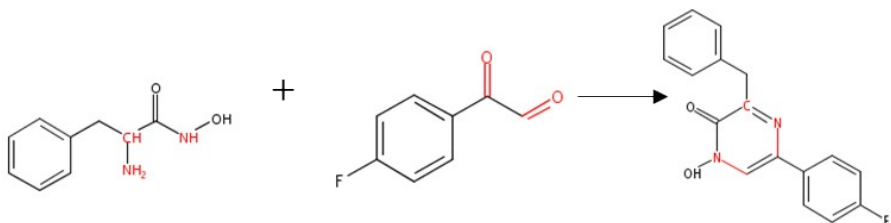

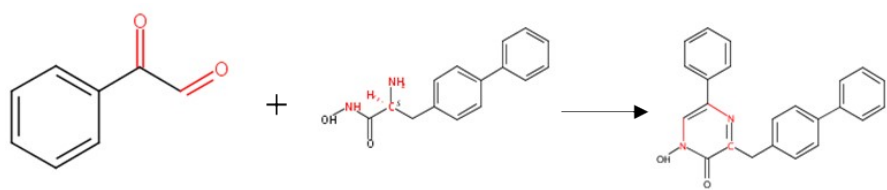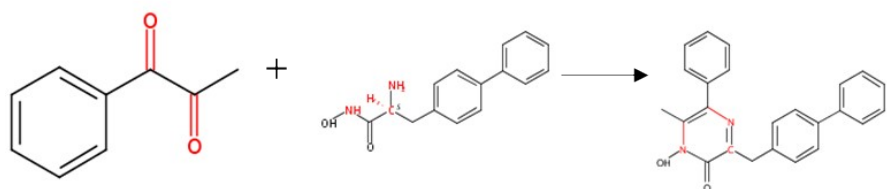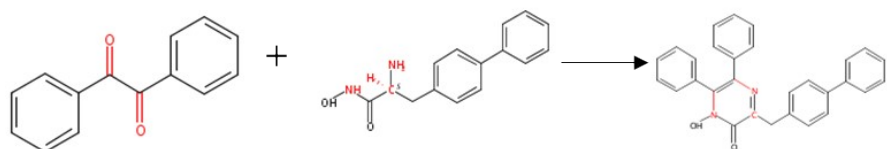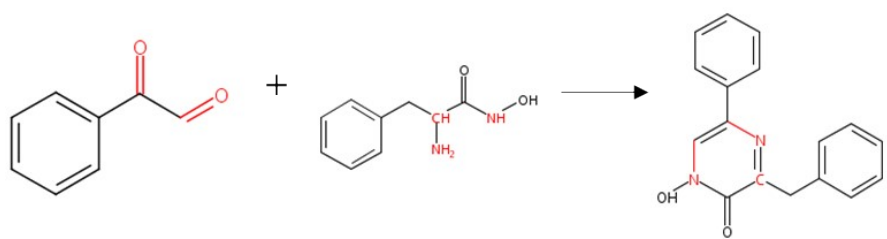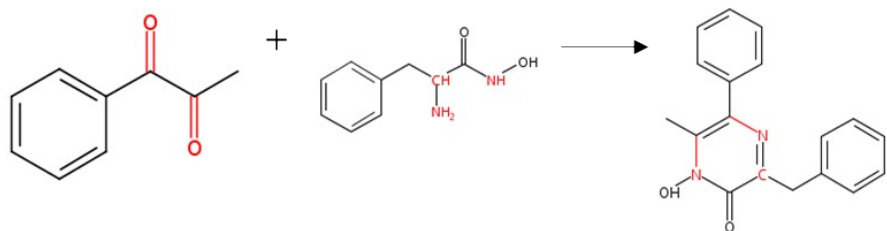

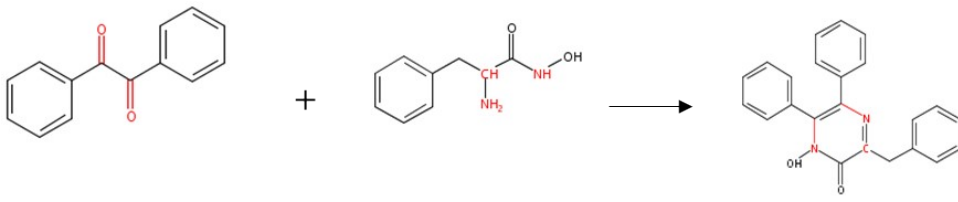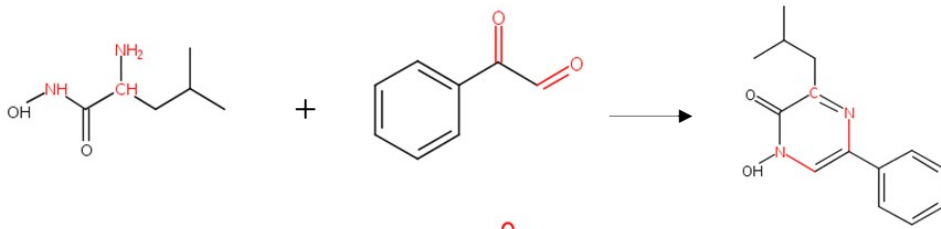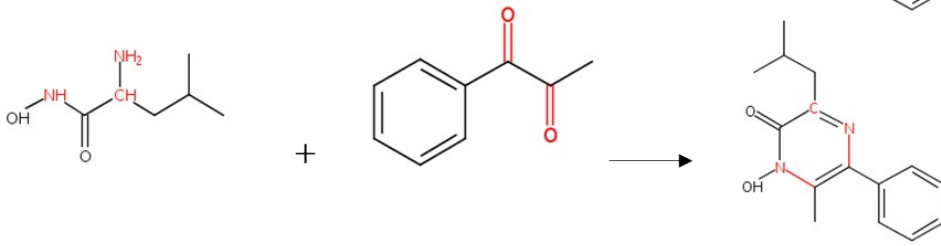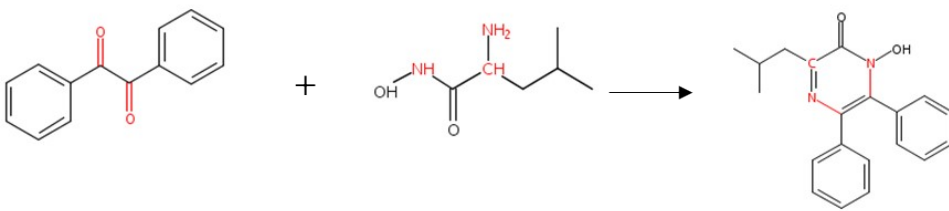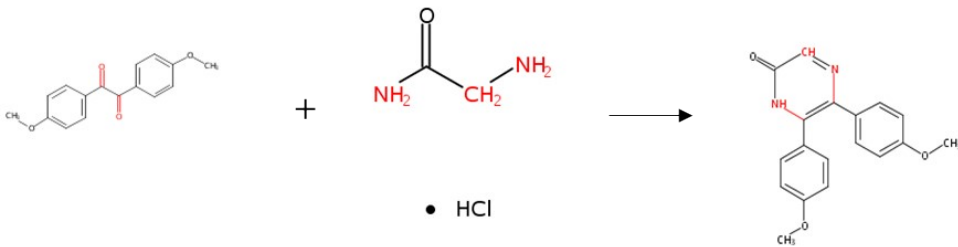

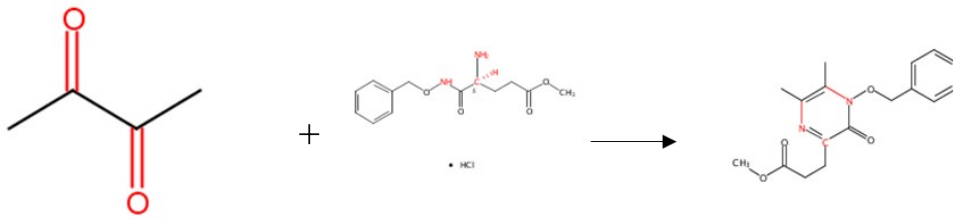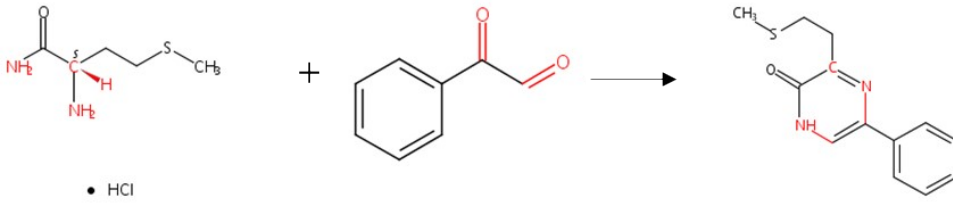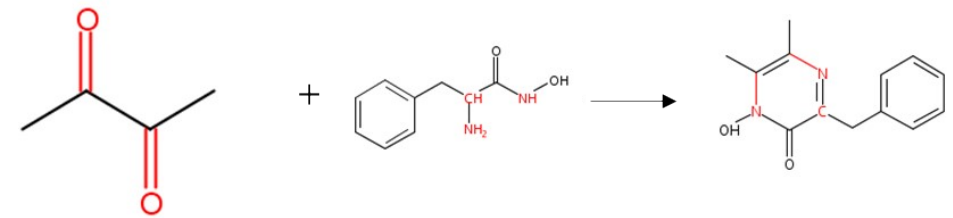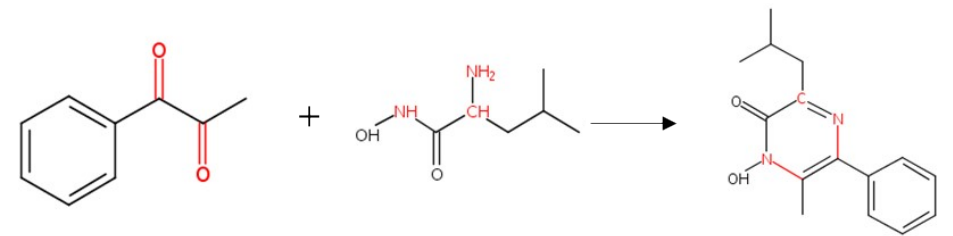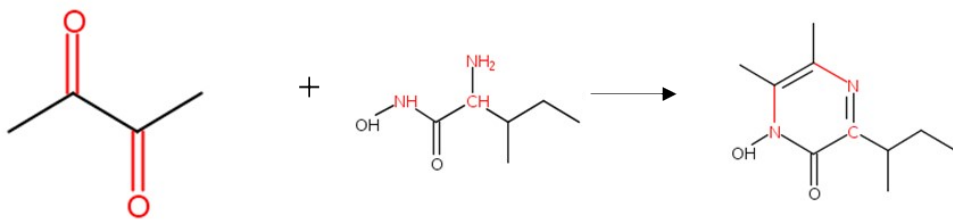

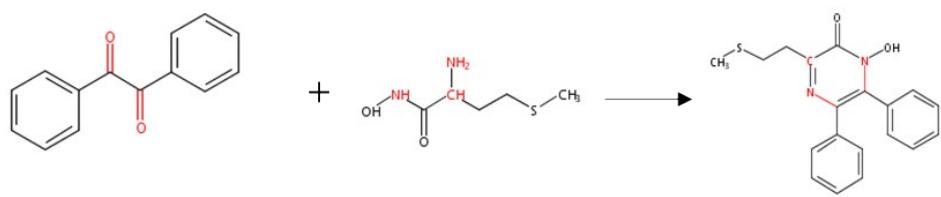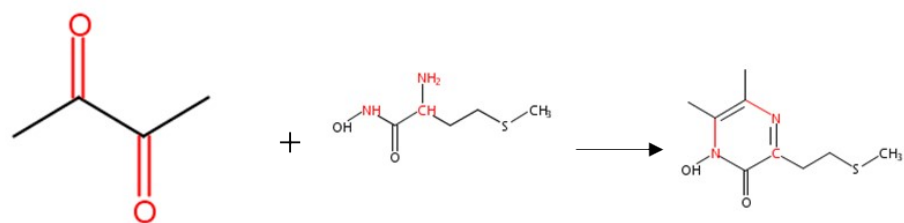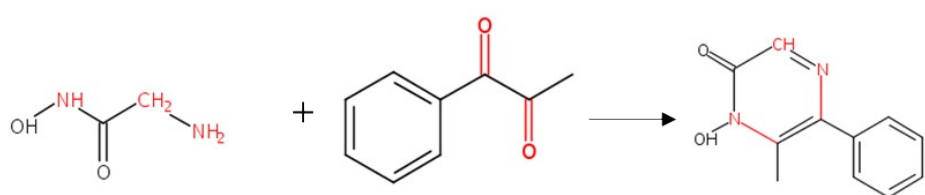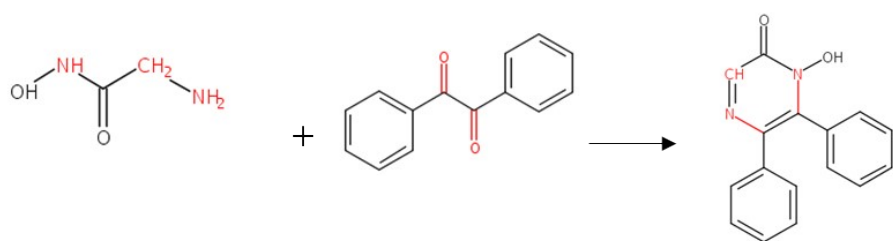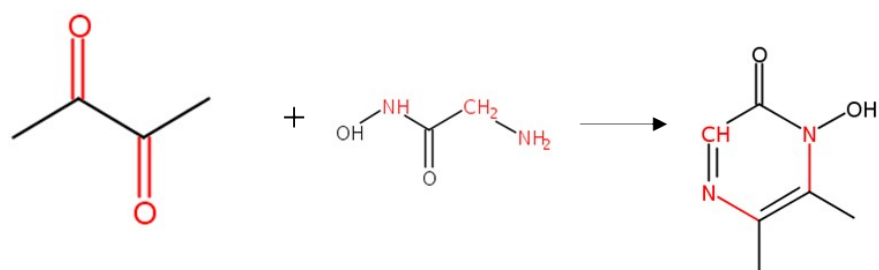

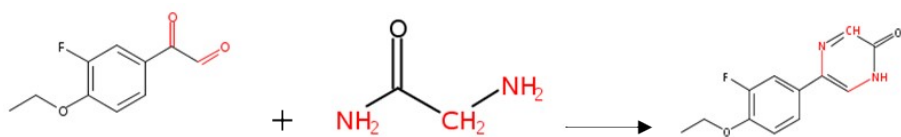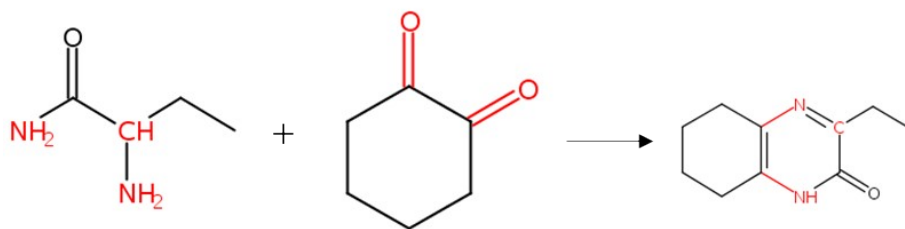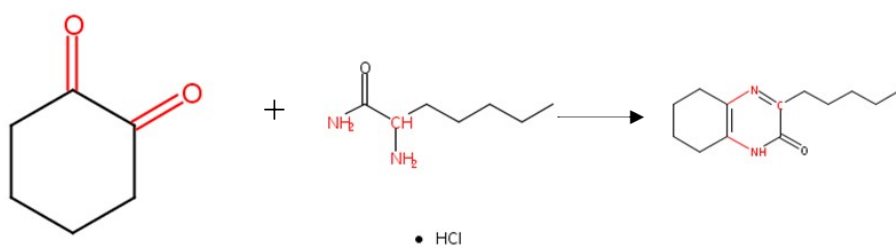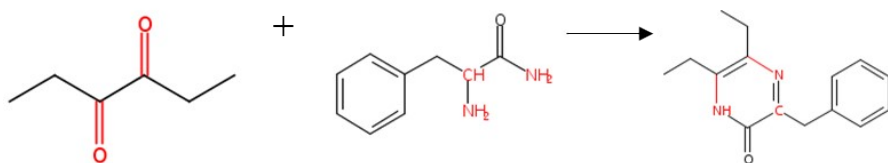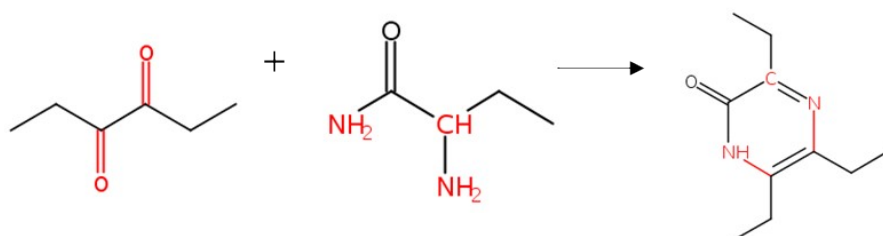

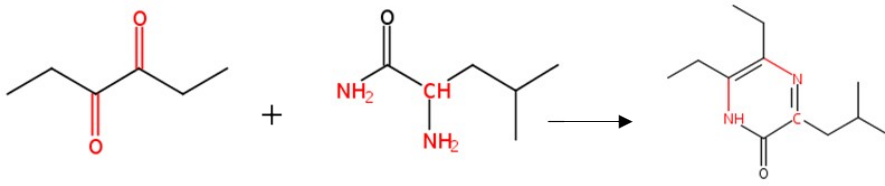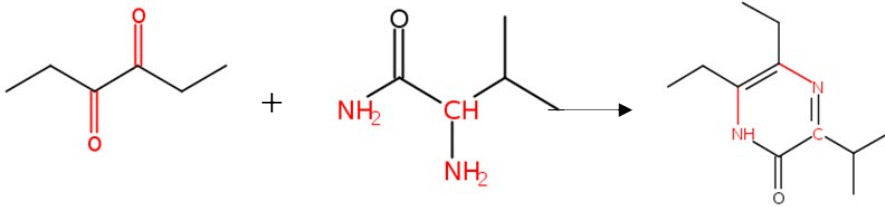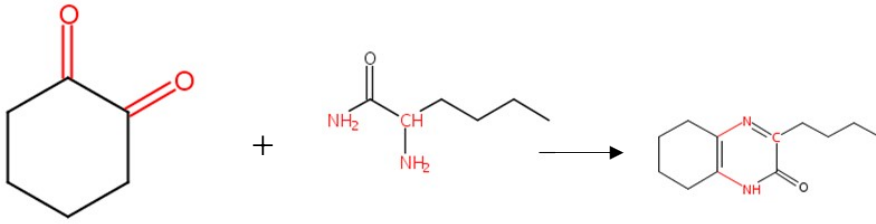

• HCl

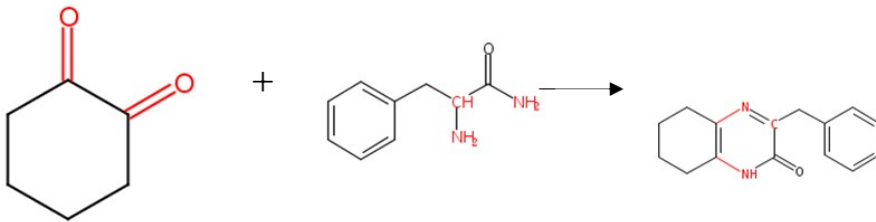

• HCl

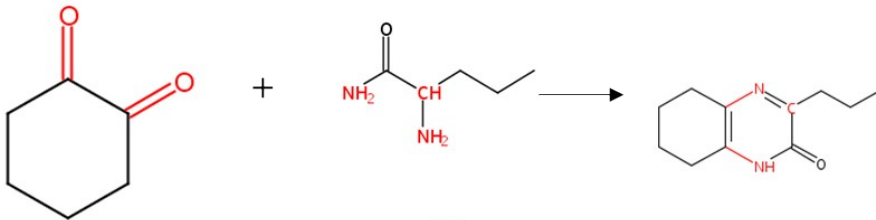

• HCl

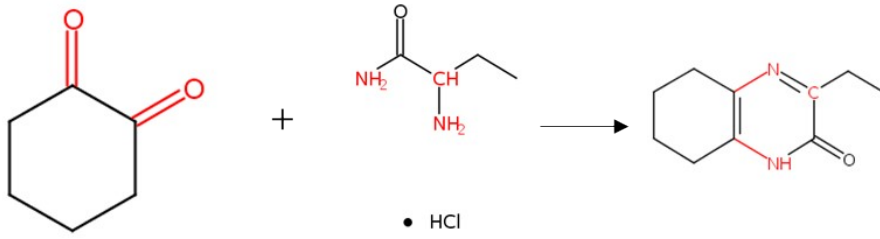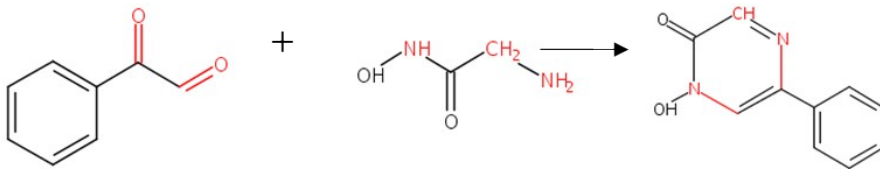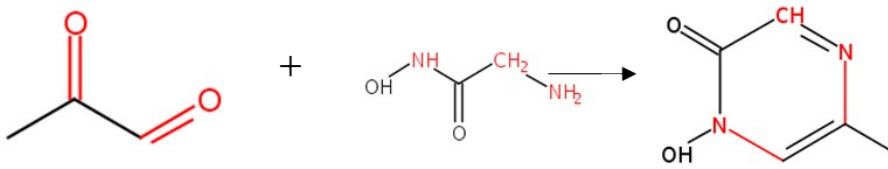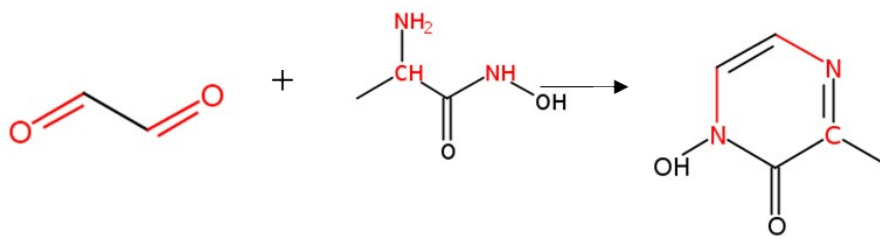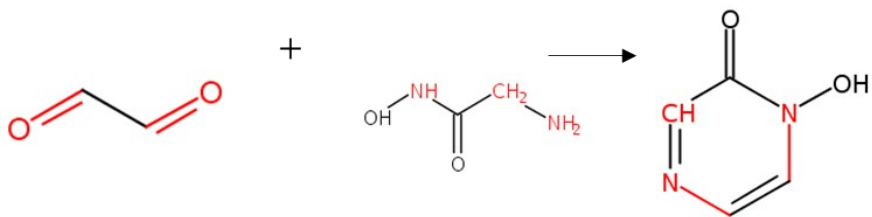



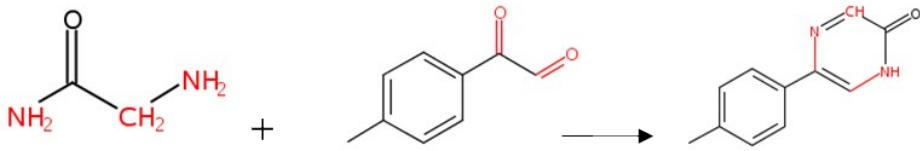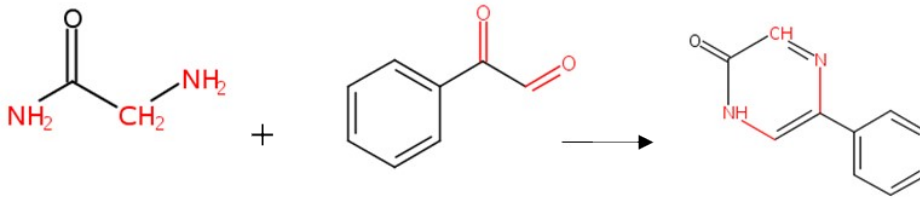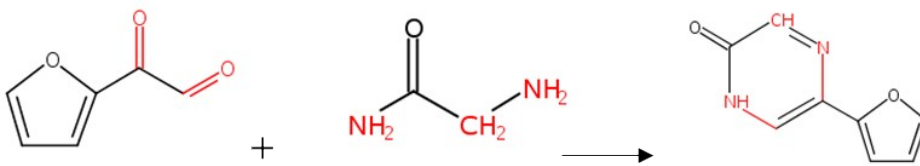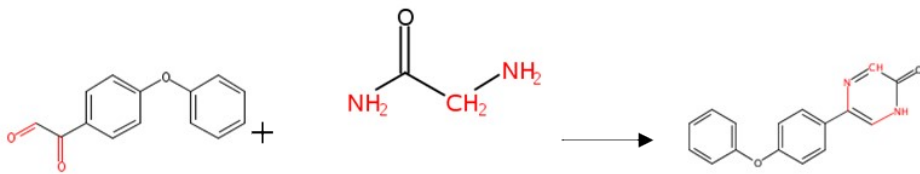

• HCl

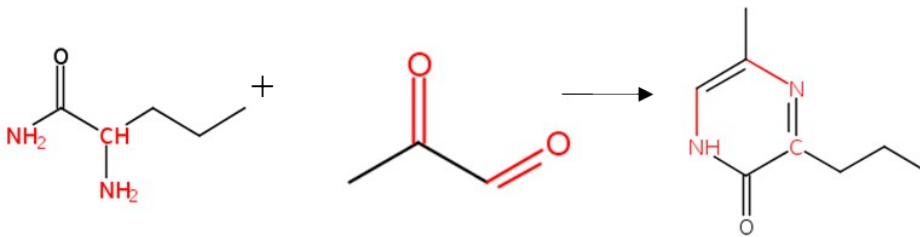

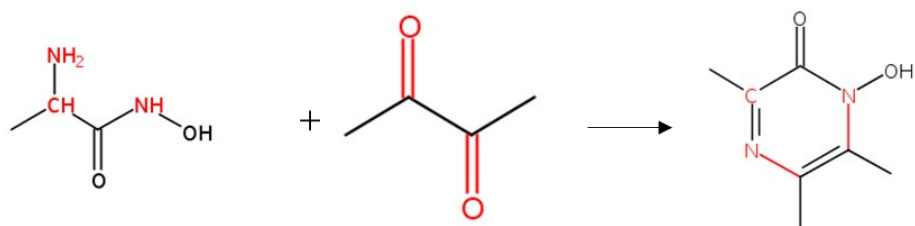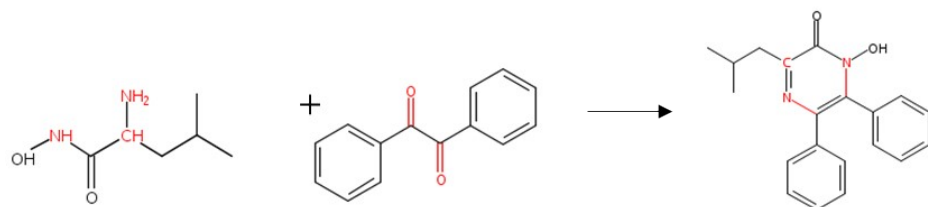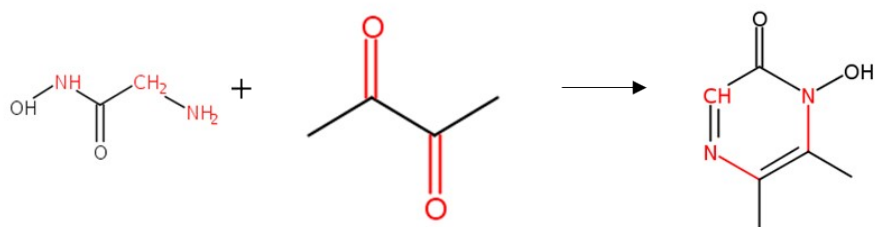

Supplement: d2md00444e2.pdf [file d2md00444e2.pdf]
